# Supplementary material for: Tuning the selectivity of catalytic nitriles hydrogenation by structure regulation in atomically dispersed Pd catalysts
Source: PubMed Central journal article supplement (PMC8548558; doi:10.1038/s41467-021-26542-y), 2021-10-26
Supplement: 41467_2021_26542_MOESM1_ESM.pdf [file 41467_2021_26542_MOESM1_ESM.pdf]

Supplementary Information

# Tuning the selectivity of catalytic nitriles hydrogenation by structure regulation in atomically dispersed Pd catalysts

*Zhibo Liu*<sup>1,2 #</sup>, *Fei Huang*<sup>2,3 #</sup>, *Mi Peng*<sup>4 #</sup>, *Yunlei Chen*<sup>5,6#</sup>, *Xiangbin Cai*<sup>7</sup>, *Linlin Wang*<sup>1,2</sup>, *Zenan Hu*<sup>1</sup>, *Xiaodong Wen*<sup>5,6</sup>, *Ning Wang*<sup>7</sup>, *Dequan Xiao*<sup>8</sup>, *Hong Jiang*<sup>4</sup>, *Hongbin Sun*<sup>1 \*</sup>, *Hongyang Liu*<sup>2,3 \*</sup> and *Ding Ma*<sup>4 \*</sup>

<sup>1</sup> Department of Chemistry, Northeastern University, Shenyang, 110819, P. R.China.

<sup>2</sup> Shenyang National Laboratory for Materials Science, Institute of Metal Research, Chinese Academy of Sciences, Shenyang 110016, P. R. China.

<sup>3</sup> School of Materials Science and Engineering, University of Science and Technology of China, Shenyang 110016, P. R. China.

<sup>4</sup> Beijing National Laboratory for Molecular Sciences, College of Chemistry and Molecular Engineering and College of Engineering, and BIC-ESAT, Peking University, Beijing 100871, P. R. China.

<sup>5</sup> State Key Laboratory of Coal Conversion, Institute Coal Chemistry, Chinese Academy of Sciences, Taiyuan 030001, P. R. China.

<sup>6</sup> University of Chinese Academy of Science, No. 19A Yuanquan Road, Beijing 100049, P. R. China.

<sup>7</sup> Department of Physics and Center for Quantum Materials, Hong Kong University of Science and Technology, Clear Water Bay, Kowloon, Hong Kong SAR, P. R. China.

<sup>8</sup> Center for Integrative Materials Discovery, Department of Chemistry and Chemical Engineering, University of New Haven, 300 Boston Post Road, West Haven, Connecticut 06516, United States. \* These authors contributed equally to this work.

**Corresponding Author**

\*Email: liuhy@imr.ac.cn; sunhb@mail.neu.edu.cn; dma@pku.edu.cn

## 1. Supplementary Figures and Tables

**Supplementary Table 1.** Physicochemical parameters of different samples.

| Sample                | Pd <sup>[a]</sup> [wt%] | S <sub>BET</sub> <sup>[b]</sup> [m <sup>2</sup> g <sup>-1</sup> ] | V <sub>pore</sub> <sup>[c]</sup> [cm <sup>3</sup> g <sup>-1</sup> ] | Pore size <sup>[d]</sup> [nm] |
|-----------------------|-------------------------|-------------------------------------------------------------------|---------------------------------------------------------------------|-------------------------------|
| ND@G                  | -                       | 331                                                               | 1.45                                                                | 17.5                          |
| Pd <sub>1</sub> /ND@G | 0.11                    | 332                                                               | 1.50                                                                | 13.8                          |
| Pd <sub>n</sub> /ND@G | 1.90                    | 345                                                               | 1.38                                                                | 15.4                          |

[a] Determined by ICP-AES. [b] BET method. [c] Volume of N<sub>2</sub> at  $p/p^0 = 0.98$ . [d] N<sub>2</sub> desorption.

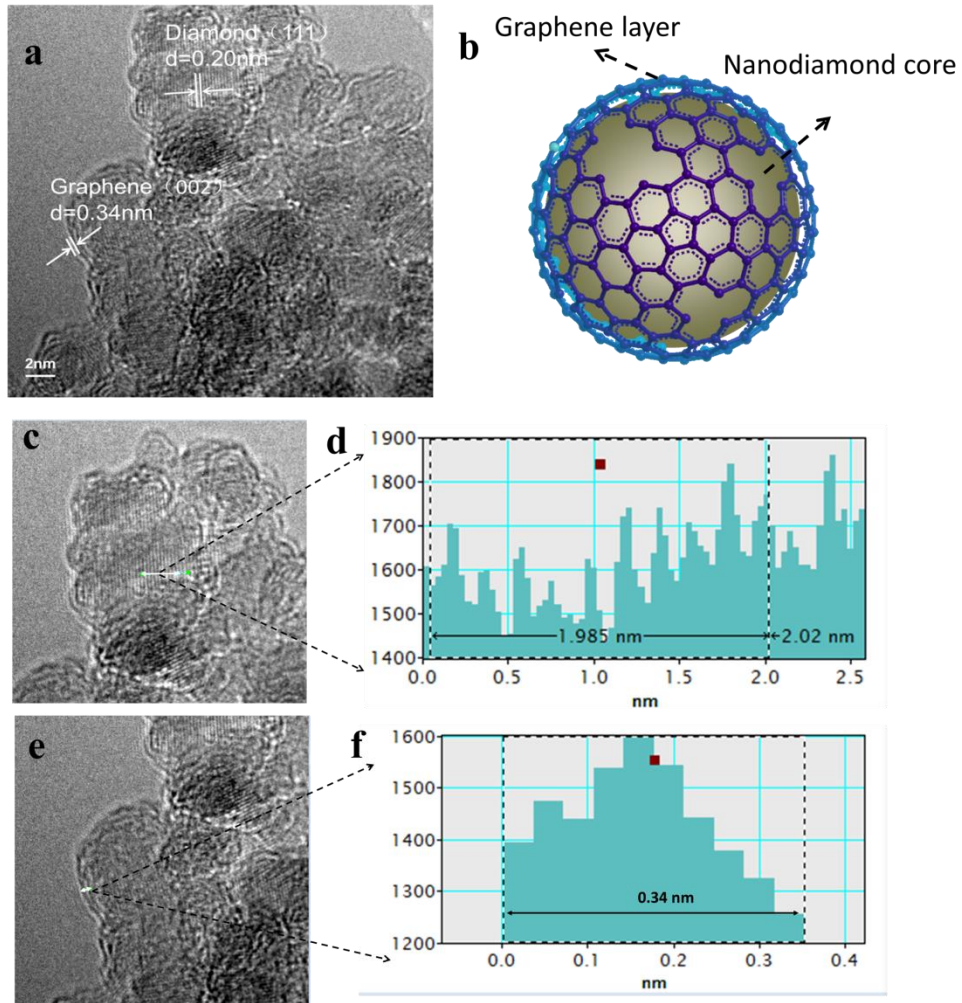

**Supplementary Figure 1.** (a) HRTEM image of the as-prepared ND@G support with nanodiamond core and defective graphene shell; (b) Structure diagram of ND@G; (c) Partial enlargement HRTEM image focusing on the nanodiamond core and (e) The corresponding line profile of the nanodiamond core; (e) Partial enlargement HRTEM image focusing on the defective graphene shell and (f) The corresponding line profile of the defective graphene shell.

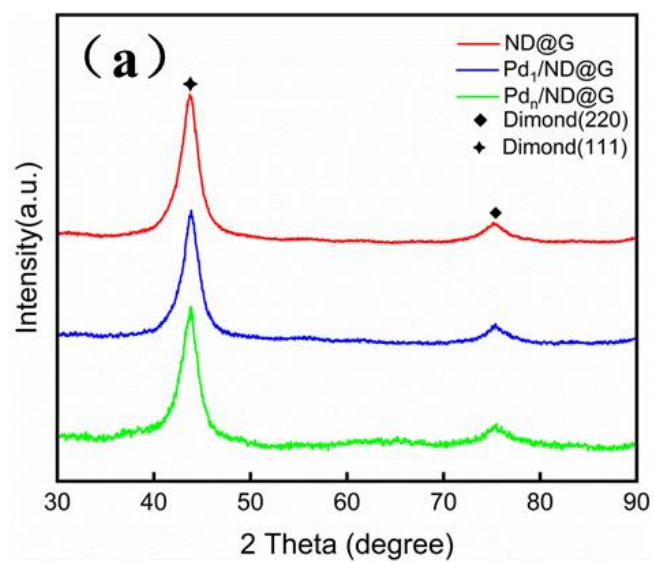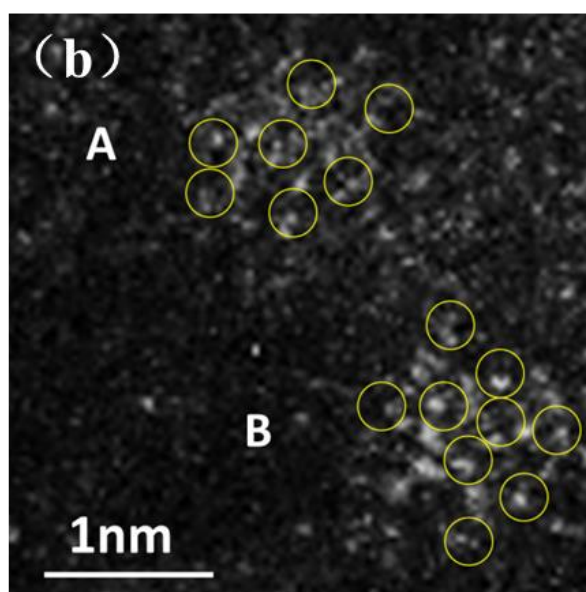

**Supplementary Figure 2.** (a) XRD profiles of Pd<sub>1</sub>/ND@G, Pd<sub>n</sub>/ND@G and pure ND@G support. (b) The magnified AC-HAADF-STEM images of two clusters in Figure 1d, the separated small Pd clusters were highlighted by yellow circles.

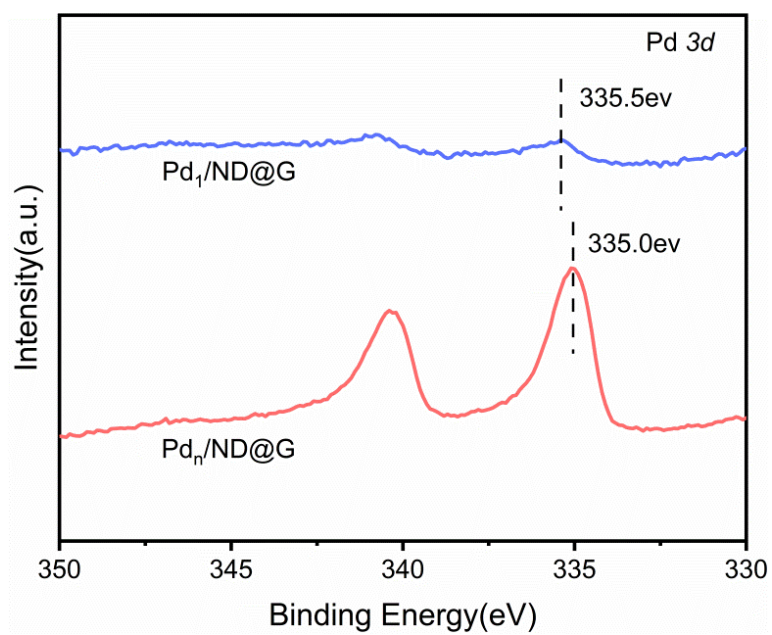

**Supplementary Figure 3.** XPS spectra of Pd<sub>1</sub>/ND@G and Pd<sub>n</sub>/ND@G.

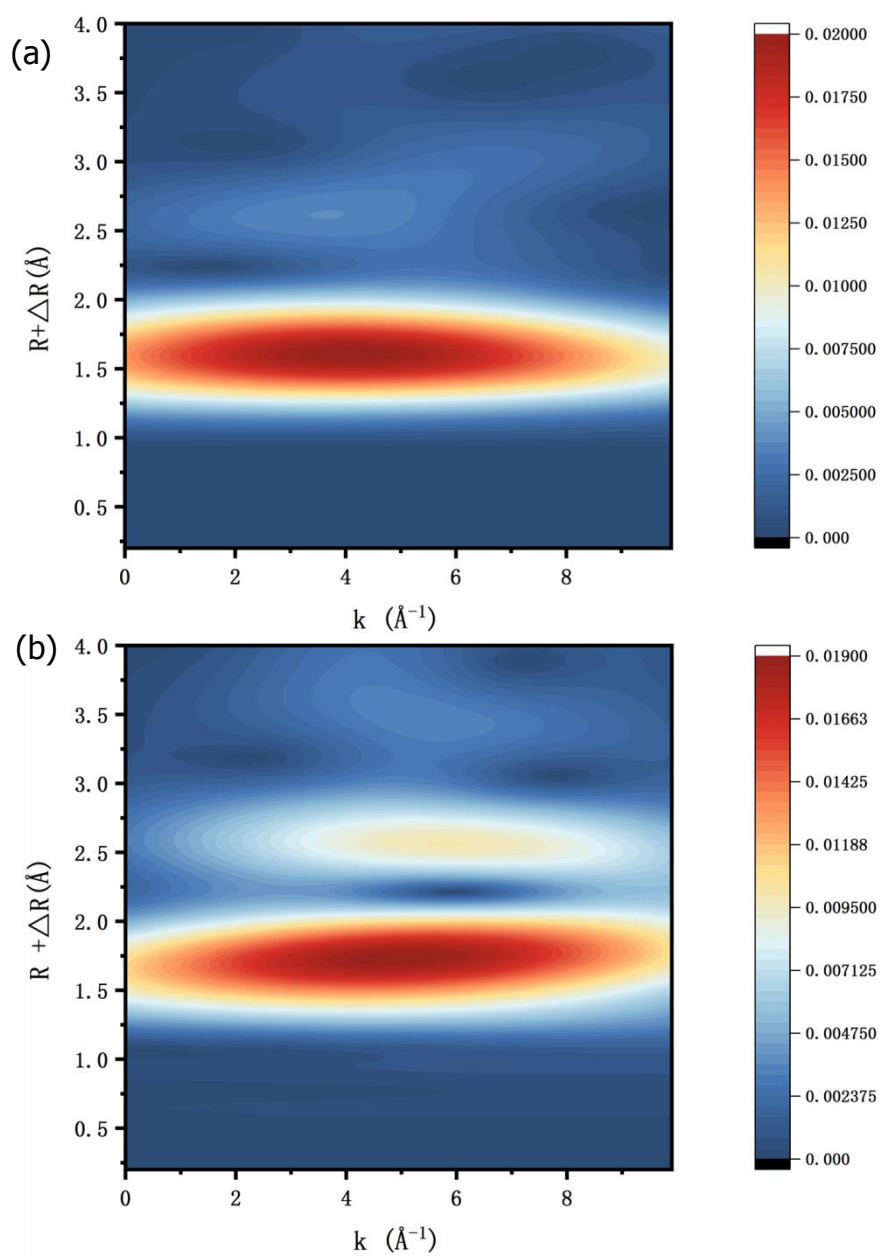

**Supplementary Figure 4.** (a) WT analysis of Pd<sub>1</sub>/ND@G. (b) WT analysis of Pd<sub>n</sub>/ND@G.

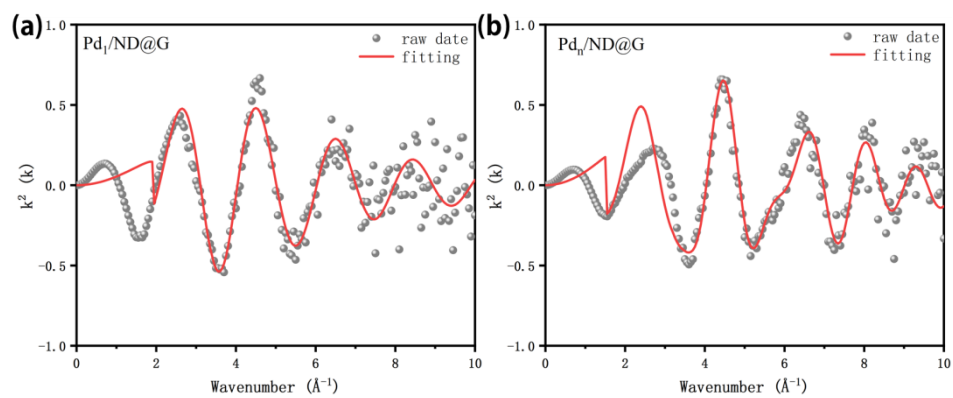

**Supplementary Figure 5.** Pd K-edge EXAFS fitting results for (a) Pd<sub>1</sub>/ND@G and (b) Pd<sub>n</sub>/ND@G .



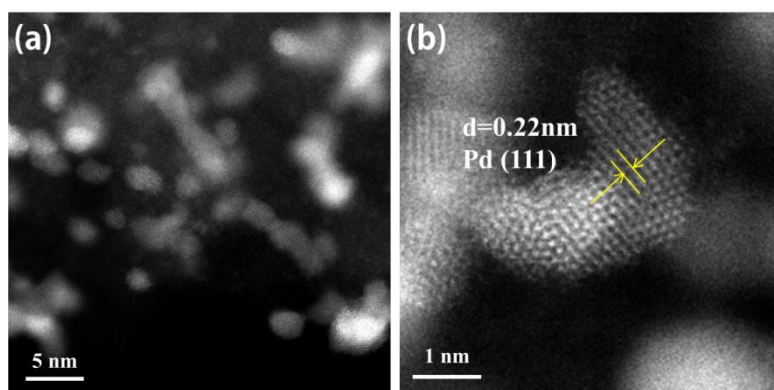

**Supplementary Figure 6.** (a, b) AC-HAADF-STEM images of the commercial Pd/C catalyst with 5 wt%.

**Supplementary Table 2.** Structural parameters extracted from quantitative EXAFS curve-fitting ( $S_0^2 = 0.8 - 0.9$ ).

| Sample                | Shell  | C.N. <sup>[a]</sup> | R(Å) <sup>[b]</sup> | $\Delta\sigma^2$ ( $/10^{-3} \text{ \AA}^2$ ) <sup>[c]</sup> | $\Delta E_0$ (eV) <sup>[d]</sup> | R factor |
|-----------------------|--------|---------------------|---------------------|--------------------------------------------------------------|----------------------------------|----------|
| Pd foil               | Pd-Pd  | 12.0                | 2.74                | 5.86                                                         | -6.49                            | 0.001    |
| PdO                   | Pd-O   | 4.0                 | 2.01                | 2.13                                                         | -2.62                            | 0.001    |
| Pd <sub>1</sub> /ND@G | Pd-Pd  | 0                   | -                   | -                                                            | -                                | 0.027    |
|                       | Pd-C/O | 2.6                 | 2.04                | 1.80                                                         | 4.660                            |          |
| Pd <sub>n</sub> /ND@G | Pd-Pd  | 1.9                 | 2.75                | 5.76                                                         | 8.603                            | 0.030    |
|                       | Pd-C/O | 2.5                 | 2.02                | 5.19                                                         |                                  |          |

[a] C.N. is the coordination number. [b] R is interatomic distance (the bond length between Pd central atoms and surrounding coordination atoms). [c]  $\sigma^2$  is Debye-Waller factor (a measure of thermal and static disorder in absorber scatterer distances). [d]  $\Delta E_0$  is edge energy shift (the difference between the zero kinetic energy value of the sample and that of the theoretical model).

**Supplementary Table 3.** Reaction conditions optimization of Pd<sub>1</sub>/ND@G for selective catalytic transfer hydrogenation of benzonitriles.

| Entry | Catalyst (mg) | T (°C) | AB. (mmol) | Conversion (%) | Selectivity (%) |     |     |
|-------|---------------|--------|------------|----------------|-----------------|-----|-----|
|       |               |        |            |                | BA              | DBA | TOL |
| 1     | 10            | 60     | 4          | 51             | 0               | 68  | 0   |
| 2     | 20            | 60     | 4          | 90             | 0               | 82  | 0   |
| 3     | 30            | 60     | 4          | >99            | 0               | >98 | 0   |
| 4     | 30            | 50     | 4          | 93             | 0               | 84  | 0   |
| 5     | 30            | 40     | 4          | 25             | 0               | 36  | 0   |
| 6     | 30            | 60     | 3          | 54             | 0               | 79  | 0   |
| 7     | 30            | 60     | 2          | 3              | 0               | 0   | 0   |

Reaction condition: 0.5 mmol Nitriles; 10 ml Methanol; 8 h. Toluene (TOL).

**Supplementary Table 4.** Catalytic performance of the Pd<sub>1</sub>/ND@G catalyst in BN hydrogenation with different solvents.

| Entry | Solvent | Conversion (%) | Selectivity (%) |     |     |
|-------|---------|----------------|-----------------|-----|-----|
|       |         |                | BA              | DBA | TOL |
| 1     | EtOH    | 48             | 77              | 23  | 0   |
| 2     | MeOH    | >99            | 0               | >98 | 0   |
| 3     | i-PrOH  | 4              | 0               | 0   | 0   |
| 4     | Hexane  | 5              | 0               | 0   | 0   |
| 5     | THF     | 6              | 0               | 0   | 0   |

Reaction condition: 0.5 mmol Nitriles; 8 h; 30 mg Pd<sub>1</sub>/ND@G catalyst; 4 mmol ammonia borane; 60 °C; 10ml solvent.

**Supplementary Table 5.** Reaction conditions optimization of Pd<sub>n</sub>/ND@G for selective catalytic transfer hydrogenation of benzonitriles.

| Entry | Catalyst (mg) | T (°C) | AB. (mmol) | Conversion (%) | Selectivity (%) |       |     |
|-------|---------------|--------|------------|----------------|-----------------|-------|-----|
|       |               |        |            |                | BA              | DBA   | TOL |
| 1     | 5             | 40     | 3          | 80             | 90              | 10    | 0   |
| 2     | 10            | 40     | 3          | >99            | >98             | trace | 0   |
| 3     | 20            | 40     | 3          | >99            | >98             | trace | 0   |
| 4     | 10            | 40     | 2          | 78             | >98             | trace | 0   |
| 5     | 10            | 40     | 4          | >99            | >98             | trace | 0   |
| 6     | 10            | 30     | 3          | 95             | >98             | 0     | 0   |
| 7     | 10            | 50     | 3          | 93             | 97              | 3     | 0   |
| 8     | 10            | 60     | 3          | 98             | 96              | 0     | 4   |

Reaction condition: 0.5 mmol Nitriles, 10 ml Methanol; 0.5 h.

**Supplementary Table 6.** Catalytic performance of the Pd<sub>n</sub>ND@G catalyst in BN hydrogenation with different solvents.

| Entry | Solvent | Conversion (%) | Selectivity (%) |       |     |
|-------|---------|----------------|-----------------|-------|-----|
|       |         |                | BA              | DBA   | TOL |
| 1     | EtOH    | 73             | 79              | trace | 15  |
| 2     | MeOH    | >99            | >98             | trace | 0   |
| 3     | i-PrOH  | 12             | 0               | 0     | 0   |
| 4     | Hexane  | 11             | 0               | 0     | 0   |
| 5     | THF     | 10             | 0               | 0     | 0   |

Reaction condition: 0.5 mmol Nitriles; 0.5 h; 10mg Pd<sub>n</sub>ND@G catalyst; 3 mmol ammonia borane; 40 °C; 10ml solvent.

**Supplementary Table 7.** Catalytic performance of different noble metal catalysts in the hydrogenation and transfer hydrogenation of benzonitriles.

| Entry                               | Reaction conditions                                              | Conversion (%) | Selectivity (%) |               | TOF (h <sup>-1</sup> ) | Reference        |
|-------------------------------------|------------------------------------------------------------------|----------------|-----------------|---------------|------------------------|------------------|
|                                     |                                                                  |                | BA              | DBA           |                        |                  |
| Pd/Al <sub>2</sub> O <sub>3</sub>   | 70 °C, 1.5 MPa H <sub>2</sub> ,<br>WHSV =<br>0.5 h <sup>-1</sup> | 96.7           | 88.9            | 0             | 100                    | 1                |
| Pd/C                                | 60 °C, 4 MPa H <sub>2</sub> , 0.33 h                             | 50             | 31              | 0             | 218                    | 2                |
| Pd/C                                | 60 °C, 0.6 MPa H <sub>2</sub> , 2.3 h                            | 100            | 80              | 0             | 180                    | 3                |
| Pd/TiO <sub>2</sub>                 | 30 °C, 0.6 MPa H <sub>2</sub> , 12.5 h                           | 75             | 94              | 0             | 13                     |                  |
| Pd/η-Al <sub>2</sub> O <sub>3</sub> | 90 °C, 1.5 MPa H <sub>2</sub> , 4 h                              | 100            | 91              | 6             | 41                     | 4                |
| 5Pd-Ni/SiO <sub>2</sub>             | 80 °C, 0.6 MPa H <sub>2</sub> , 3 h                              | 100            | 3.5             | 96.5          | 515                    | 5                |
| <b>Pd<sub>n</sub>/ND@G</b>          | <b>40 °C, 3mmol<br/>AB.(0.1MPa), 0.5 h</b>                       | <b>&gt;99</b>  | <b>&gt;98</b>   | <b>trace</b>  | <b>543</b>             |                  |
| <b>Pd<sub>1</sub>/ND@G</b>          | <b>60 °C, 4mmol<br/>AB.(0.1MPa), 8 h</b>                         | <b>&gt;99</b>  | <b>0</b>        | <b>&gt;98</b> | <b>709</b>             | <b>This work</b> |
| Pt /C                               | 105 °C, 5.5 MPa H <sub>2</sub> , 2.5 h                           | 100            | 0               | 97            | 780                    | 6                |
| Pt/Al <sub>2</sub> O <sub>3</sub>   | 100 °C, 1.5 MPa H <sub>2</sub> , 24 h                            | 100            | 12              | 0             | 20                     | 7                |
| Pt/C                                | r.t., 0.34 MPa H <sub>2</sub> , 4 h                              | 100            | 0               | 93            | 50                     | 8                |
| Rh/C                                | 50 °C, 2 MPa H <sub>2</sub> , 10 MPa<br>CO <sub>2</sub> , 4 h    | 28.8           | 25              | 75            | 14.4                   | 9                |
| Rh/Al <sub>2</sub> O <sub>3</sub>   |                                                                  | 21             | 22.4            | 77.6          | 10                     |                  |
| Ru-NPs                              | 290 °C, 6.2 MPa H <sub>2</sub> , 72 h                            | 100            | 56.6            | 0             | 140                    | 10               |
| Ru/K-Al <sub>2</sub> O <sub>3</sub> | 70 °C, 0.1 MPa H <sub>2</sub> , 82 h                             | 100            | 93              | 0             | 1.2                    | 11               |
| Ir/Al <sub>2</sub> O <sub>3</sub>   | 100 °C, 2.1 MPa H <sub>2</sub>                                   | 20             | 36              | 52            | 66                     | 12               |

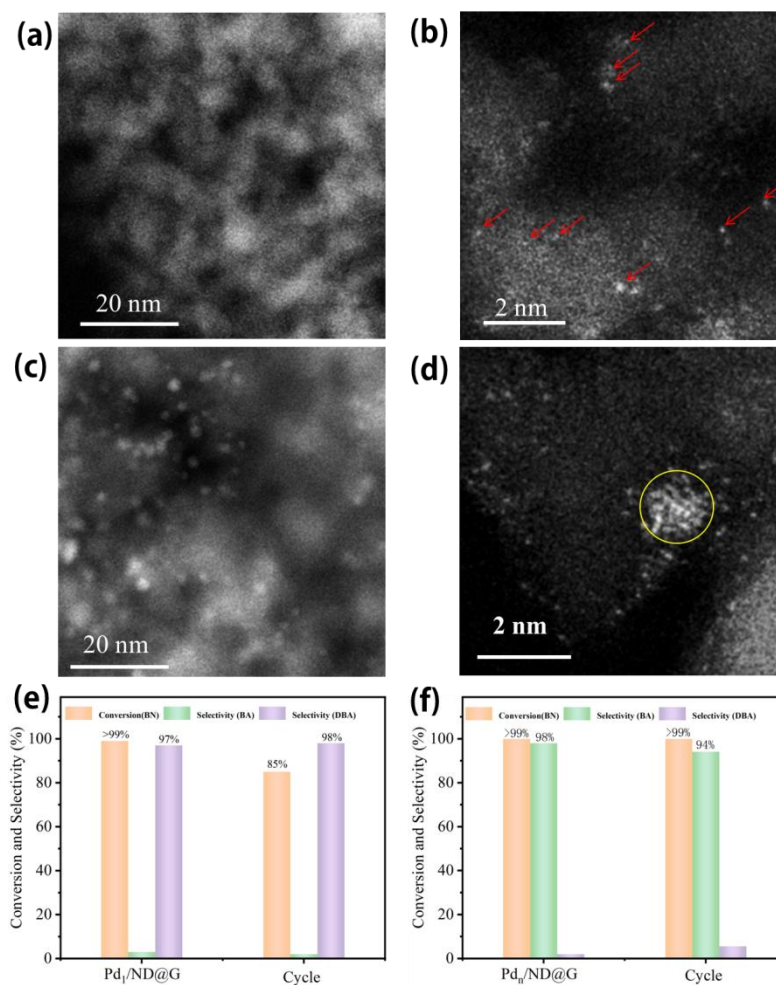

**Supplementary Figure 7.** The AC-HAADF-STEM images of the Pd<sub>1</sub>/ND@G catalyst at low (a) and high (b) magnification after the transfer hydrogenation of benzonitrile. The AC-HAADF-STEM images of the Pd<sub>n</sub>/ND@G catalyst at low (c) and high (d) magnification after the transfer hydrogenation of benzonitrile. (e) The recycling experiments of the Pd<sub>1</sub>/ND@G catalyst used for the transfer hydrogenation of benzonitrile. Reaction conditions: solvent, methanol, 10 mL; BN, 0.5 mmol; catalyst, 60 mg; AB, 4 mmol; Temperature, 60 °C; Time, 8 h. (f) The recycling experiments of the Pd<sub>n</sub>/ND@G catalyst used for the transfer hydrogenation of benzonitrile. Reaction conditions: solvent, methanol, 10 mL; BN, 0.5 mmol; catalyst, 10 mg; AB, 3mmol; Temperature, 40 °C; Time, 30 min.



**Supplementary Table 8.** Relative configurations and energies of different stationary intermediates on Pd<sub>1</sub>/ND@G.

| Species                             | Configurations and Energy                                                                                  |
|-------------------------------------|------------------------------------------------------------------------------------------------------------|
| PhCN*                               | 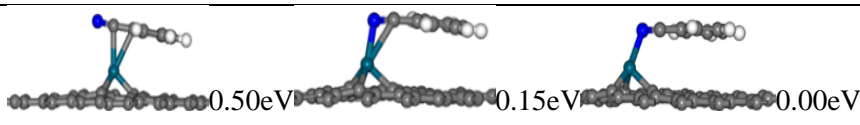 0.50 eV 0.15 eV 0.00 eV |
| PhCN*+H <sub>2</sub> *              |  0.50 eV                  |
| PhCN*+2H*                           |  0.47 eV 0.00 eV         |
| PhCNH*+H*                           |  0.26 eV 0.00 eV 0.35 eV |
|                                     |  0.34 eV                  |
| PhCHNH*                             |  0.26 eV 0.00 eV       |
| PhCHNH*+H <sub>2</sub> *            |                         |
| PhCHNH*+2H*                         |  0.47 eV 0.00 eV       |
| PhCHNH <sub>2</sub> *+H*            |  0.00 eV 0.67 eV       |
| PhCH <sub>2</sub> NH <sub>2</sub> * |                         |

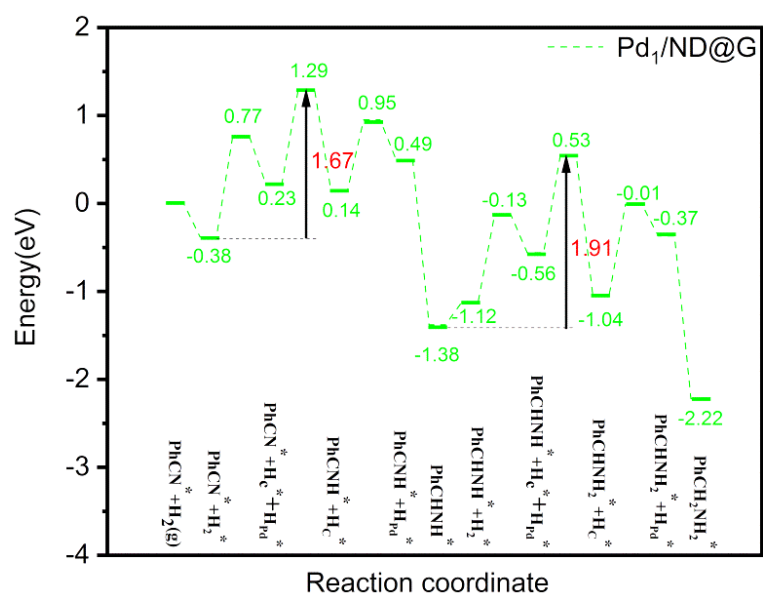

**Supplementary Figure 8.** The energies of species in the process of hydrogenation reaction from benzonitrile to benzylamine on Pd<sub>1</sub>/ND@G.

**Supplementary Table 9.** Relative configurations and energies of different stationary intermediates on Pd<sub>n</sub>/ND@G.

| Species                             | Configurations and Energy                                                                                     |
|-------------------------------------|---------------------------------------------------------------------------------------------------------------|
| PhCN*                               | 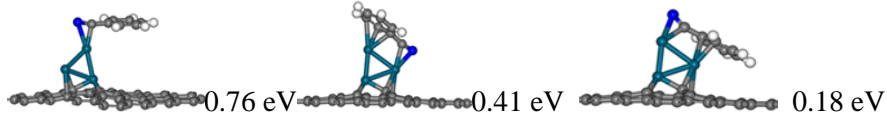<br>0.76 eV 0.41 eV 0.18 eV |
|                                     | <br>0.00 eV 0.20 eV         |
| PhCN*+2H                            | <br>0.00 eV 0.10 eV 0.96 eV |
|                                     | <br>0.34 eV                  |
| PhCNH*+H*                           | <br>0.00 eV 1.13 eV         |
| PhCNH*+H*                           | <br>0.94 eV 0.39 eV        |
| PhCHNH*                             |                            |
| PhCHNH*+2H                          | <br>0.00 eV 0.30 eV       |
| PhCHNH <sub>2</sub> *+H*            | <br>0.00 eV 1.03 eV       |
| PhCH <sub>2</sub> NH*+H*            | <br>0.40 eV                |
| PhCH <sub>2</sub> NH <sub>2</sub> * |                            |

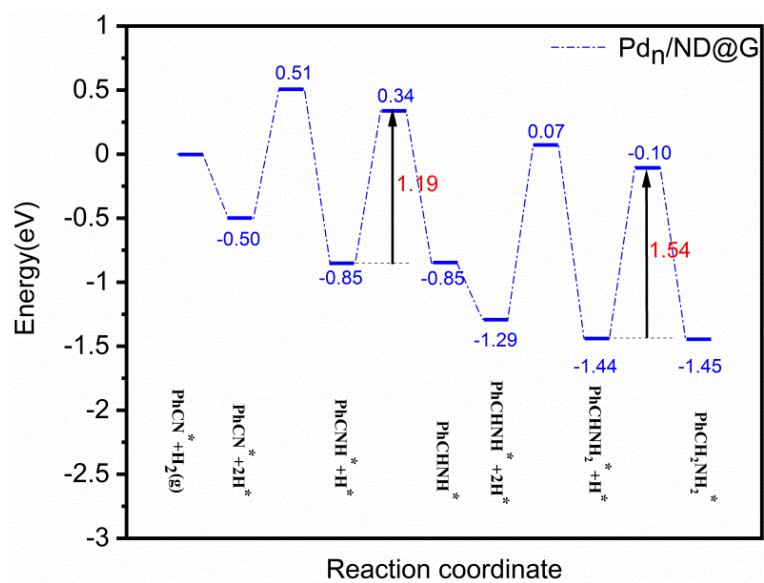

**Supplementary Figure 9.** The energies of species in the process of hydrogenation reaction from benzonitrile to benzylamine on  $\text{Pd}_n/\text{ND@G}$ .

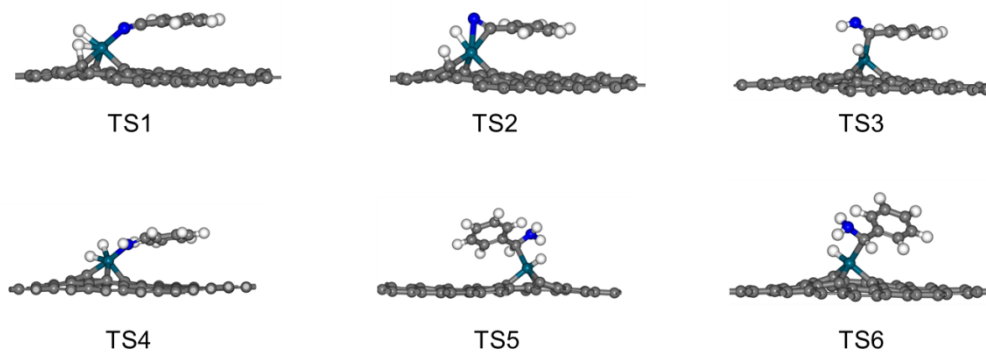

**Supplementary Figure 10.** Structures of key transition states of benzonitrile hydrogenation on Pd<sub>1</sub>/ND@G.

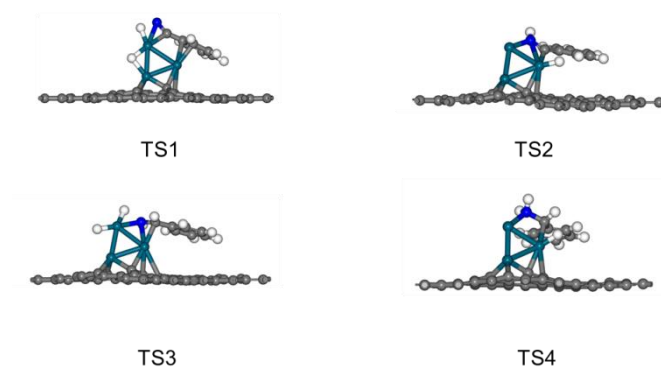

**Supplementary Figure 11.** Structures of key transition states of benzonitrile hydrogenation on Pd<sub>n</sub>/ND@G.

**Supplementary Table 10.** Step by step barrier ( $E_a$ , eV) and enthalpy energy change ( $\Delta E$ , eV) of benzonitrile to benzylamine on Pd<sub>1</sub>-Gr.

| Number | Elementary reactions                                                                                        | $E_a$ (eV) | $\Delta E$ (eV) |
|--------|-------------------------------------------------------------------------------------------------------------|------------|-----------------|
| 1      | $\text{PhCN} = \text{PhCN}^*$                                                                               | -0.77      | -               |
| 2      | $\text{H}_2(\text{g}) + \text{PhCN}^* = \text{PhCN}^* + \text{H}_2^*$                                       | -0.77      | -               |
| 3      | $\text{PhCN}^* + \text{H}_2^* = \text{H}^*(\text{C}) + \text{H}^*(\text{Pd}) + \text{PhCN}^*$               | 0.61       | 1.15            |
| 4      | $\text{H}^*(\text{C}) + \text{H}^*(\text{Pd}) + \text{PhCN}^* = \text{H}(\text{C}) + \text{PhCNH}^*$        | -0.09      | 1.06            |
| 5      | $\text{H}^*(\text{C}) + \text{PhCNH}^* = \text{H}^*(\text{Pd}) + \text{PhCNH}^*$                            | 0.35       | 0.81            |
| 6      | $\text{H}^*(\text{Pd}) + \text{PhCNH}^* = \text{PhCHNH}^*$                                                  | -1.87      | -               |
| 7      | $\text{H}_2(\text{g}) + \text{PhCHNH} = \text{H}_2^* + \text{PhCHNH}^*$                                     | -0.13      | -               |
| 8      | $\text{H}_2^* + \text{PhCHNH}^* = \text{H}^*(\text{C}) + \text{H}^*(\text{Pd}) + \text{PhCHNH}^*$           | 0.56       | 0.99            |
| 9      | $\text{H}^*(\text{C}) + \text{H}^*(\text{Pd}) + \text{PhCHNH}^* = \text{H}^*(\text{C}) + \text{PhCHNH}_2^*$ | -0.48      | 1.09            |
| 10     | $\text{H}^*(\text{C}) + \text{PhCHNH}_2^* = \text{H}^*(\text{Pd}) + \text{PhCHNH}_2^*$                      | 0.67       | 1.03            |
| 11     | $\text{H}^*(\text{Pd}) + \text{PhCHNH}_2^* = \text{PhCH}_2\text{NH}_2^*$                                    | -1.06      | -               |

**Supplementary Table 11.** Step by step barrier ( $E_a$ , eV) and enthalpy energy change ( $\Delta E$ , eV) of benzonitrile to benzylamine on Pd<sub>n</sub>-Gr.

| Number | Elementary reactions                                           | $E_a$ (eV) | $\Delta E$ (eV) |
|--------|----------------------------------------------------------------|------------|-----------------|
| 1      | PhCN= PhCN*                                                    | -1.58      | -               |
| 2      | H <sub>2</sub> (g) + PhCN* = PhCN*+2H*                         | -0.89      | -               |
| 3      | PhCN*+2H* = PhCNH*+H*                                          | -0.35      | 1.01            |
| 4      | PhCNH*+H* = PhCHNH*                                            | 0.00       | 1.19            |
| 5      | H <sub>2</sub> (g) + PhCHNH* = 2H* + PhCHNH*                   | -0.83      | -               |
| 6      | 2H* + PhCHNH* = PhCHNH <sub>2</sub> *+H*                       | -0.15      | 1.36            |
| 7      | PhCHNH <sub>2</sub> *+H* = PhCH <sub>2</sub> NH <sub>2</sub> * | -0.01      | 1.34            |



## Characterization data of products

### Primary amines

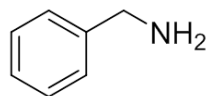

Benzylamine (yellowish liquid)<sup>13</sup>

Isolated yield: 93%

<sup>1</sup>H NMR (600 MHz, Chloroform-d)  $\delta$  7.33-7.26 (m, 5H), 3.83 (s, 2H), 2.03 (s, active H).

<sup>13</sup>C NMR (151 MHz, Chloroform-d)  $\delta$  128.97, 128.77, 128.15, 127.72, 45.34.

GC-MS: *m/z* (%) 107 (60) [M]<sup>+</sup>, 106 (100), 91 (15), 79 (48), 77 (25), 65 (10), 51 (18).

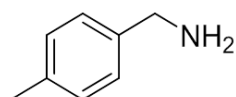

p-tolylmethanamine (colorless liquid)<sup>14</sup>

Isolated yield: 89%

<sup>1</sup>H NMR (600 MHz, Chloroform-d)  $\delta$  7.19 (d, J = 7.9 Hz, 2H), 7.17 (d, J = 7.8 Hz, 2H), 3.82 (s, 2H), 2.34 (s, 3H), 1.74 (s, active H).

<sup>13</sup>C NMR (151 MHz, Chloroform-d)  $\delta$  140.17, 136.60, 129.37, 127.23, 46.30, 21.20.

GC-MS: *m/z* (%) 121 (23) [M]<sup>+</sup>, 120 (62), 104 (100), 91 (65), 77 (42), 65 (28), 51 (22).

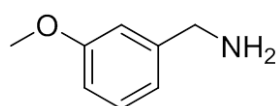

(3-methoxyphenyl)methanamine (yellowish liquid)<sup>14</sup>

Isolated yield: 91%

<sup>1</sup>H NMR (600 MHz, Chloroform-d)  $\delta$  7.28 – 7.20 (m, 1H), 6.86 (d, J = 14.4 Hz, 2H), 6.78 (d, J = 2.2 Hz, 1H), 3.81 (s, 2H), 3.79 (s, 3H), 1.76 (s, 2H).

<sup>13</sup>C NMR (151 MHz, Chloroform-d)  $\delta$  159.81, 144.87, 129.52, 119.31, 112.59, 112.20, 55.14, 46.38.

GC-MS: *m/z* (%) 137 (65) [M]<sup>+</sup>, 136 (100), 121 (24), 106 (64), 94 (42), 77 (56), 65 (32), 51 (30).

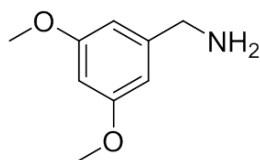

(3,5-dimethoxyphenyl)methanamine (yellowish liquid) (CAS: 1391721-68-8)

Isolated yield: 90%

$^1\text{H}$  NMR (600 MHz, Chloroform-d)  $\delta$  6.45 (s, 2H), 6.32 (s, 1H), 3.76 (s, 2H), 3.75 (s, 6H), 1.94 (s, 2H).

$^{13}\text{C}$  NMR (151 MHz, Chloroform-d)  $\delta$  160.98, 145.60, 104.91, 98.73, 55.23, 46.50.

GC-MS:  $m/z$  (%) 167 (53)  $[\text{M}]^+$ , 166 (65), 146 (63), 136 (30), 105 (100), 77 (50), 65 (27), 51 (25).

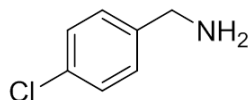

(4-chlorophenyl)methanamine (colorless liquid)<sup>15</sup>

Isolated yield: 83%

$^1\text{H}$  NMR (600 MHz, Chloroform-d)  $\delta$  7.30 (d,  $J = 9.2$  Hz, 2H), 7.25 (d,  $J = 14.5$  Hz, 2H), 3.84 (s, 2H), 1.73 (s, active H).

$^{13}\text{C}$  NMR (151 MHz, Chloroform-d)  $\delta$  141.61, 132.64, 128.75, 128.61, 45.87.

GC-MS:  $m/z$  (%) 141 (8)  $[\text{M}]^+$ , 140 (35), 106 (100), 89 (15), 77 (45), 63 (12), 51 (25).

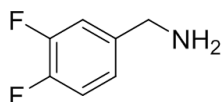

(3,4-difluorophenyl)methanamine (colorless liquid) (CAS: 72235-53-1)

Isolated yield: 81%

$^1\text{H}$  NMR (600 MHz, Chloroform-d)  $\delta$  7.13 (d,  $J = 2.8$  Hz, 1H), 7.05 (d,  $J = 10.2$  Hz, 1H), 7.03 (s, 1H), 3.84 (s, 2H), 1.72 (s, active H).

$^{13}\text{C}$  NMR (151 MHz, Chloroform-d)  $\delta$  150.19 (d,  $J = 12.8$  Hz), 149.65 (d,  $J = 12.8$  Hz), 140.20, 123.21–122.77 (m), 117.25 (d,  $J = 16.8$  Hz), 116.07 (d,  $J = 17.2$  Hz), 45.55.

GC-MS:  $m/z$  (%) 143 (15)  $[\text{M}]^+$ , 142 (60), 123 (100), 95 (17), 75 (22), 63 (45), 51 (10).

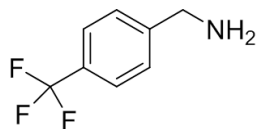

(4-(trifluoromethyl)phenyl)methanamine (brown liquid)<sup>13</sup>

Isolated yield: 94%

<sup>1</sup>H NMR (600 MHz, Chloroform-d)  $\delta$  7.59 (d, J = 8.0 Hz, 2H), 7.44 (d, J = 8.0 Hz, 2H), 3.94 (s, 2H), 1.76 (s, 2H).

<sup>13</sup>C NMR (151 MHz, Chloroform-d)  $\delta$  147.04, 128.65, 127.47, 125.80, 124.69 (m), 46.06.

GC-MS: *m/z* (%) 175 (46) [M]<sup>+</sup>, 174 (87), 156 (20), 127 (59), 106 (100), 77 (26), 69 (27), 51 (26).

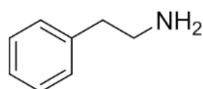

Phenethylamine (yellowish liquid)<sup>13</sup>

Isolated yield: 85%

<sup>1</sup>H NMR (600 MHz, Chloroform-d)  $\delta$  7.32 (d, J = 12.3 Hz, 2H), 7.28 (s, 2H), 7.21 (s, 1H), 3.52 (dd, J = 14.5, 8.3 Hz, 1H), 2.82 (d, J = 6.2 Hz, 2H), 1.94 (s, 2H).

<sup>13</sup>C NMR (151 MHz, Chloroform-d)  $\delta$  139.01, 128.84 (d, J = 13.0 Hz), 126.67, 40.78, 35.76.

GC-MS: *m/z* (%) 121 (21) [M]<sup>+</sup>, 120 (30), 91 (100), 77 (21), 65 (68), 51 (26).

### Secondary amines

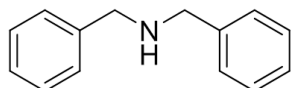

Dibenzylamine (colorless liquid)<sup>16</sup>

Isolated yield: 91%

<sup>1</sup>H NMR (600 MHz, Chloroform-d)  $\delta$  7.29 (d, J = 6.7 Hz, 8H), 7.21 (s, 2H), 3.76 (s, 4H), 1.92 (s, 1H).

<sup>13</sup>C NMR (151 MHz, Chloroform-d)  $\delta$  140.23, 128.42, 128.19, 126.98, 53.13.

GC-MS: *m/z* (%) 197 (12) [M]<sup>+</sup>, 196 (14), 106 (77), 91 (100), 65 (24), 51 (10).

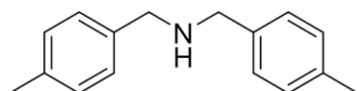

bis(4-methylbenzyl)amine (yellowish liquid)<sup>16</sup>

Isolated yield: 82%

<sup>1</sup>H NMR (600 MHz, Chloroform-d)  $\delta$  7.20 (d, J = 7.9 Hz, 4H), 7.12 (d, J = 7.8 Hz, 4H), 3.73 (s, 4H), 2.32 (s, 6H), 2.11 (s, 1H).

$^{13}\text{C}$  NMR (151 MHz, Chloroform-d)  $\delta$  137.13, 136.59, 129.16, 128.25, 52.79, 21.18.

GC-MS:  $m/z$  (%) 225 (8)  $[\text{M}]^+$ , 120 (65), 105 (100), 91 (30), 77 (26), 65 (12), 51 (10).

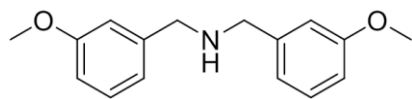

bis(3-methoxybenzyl)amine (yellowish liquid)<sup>17</sup>

Isolated yield: 81%

$^1\text{H}$  NMR (600 MHz, Chloroform-d)  $\delta$  7.22 (t,  $J = 8.0$  Hz, 2H), 6.90 (d,  $J = 2.1$  Hz, 4H), 6.79 (d,  $J = 8.2$  Hz, 2H), 3.78 (s, 6H), 3.76 (s, 4H), 2.16 (s, 1H).

$^{13}\text{C}$  NMR (151 MHz, Chloroform-d)  $\delta$  159.82, 141.76, 129.44, 120.54, 113.70, 112.60, 55.22, 53.01.

GC-MS:  $m/z$  (%) 257 (1)  $[\text{M}]^+$ , 136 (83), 122 (100), 121 (75), 91 (39), 77 (27), 65 (23), 51 (10).

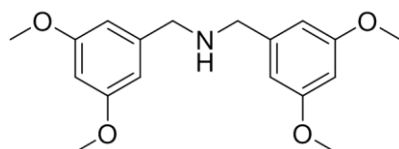

bis(3,5-dimethoxybenzyl)amine (white solid) (CAS:256225-28-2)

Isolated yield: 89%

$^1\text{H}$  NMR (600 MHz, Chloroform-d)  $\delta$  6.50 (s, 4H), 6.36 (s, 2H), 3.77 (s, 12H), 3.73 (s, 4H), 2.12 (s, 1H).

$^{13}\text{C}$  NMR (151 MHz, Chloroform-d)  $\delta$  160.79, 142.63, 106.97, 98.92, 55.13, 53.04.

GC-MS:  $m/z$  (%) 317 (1)  $[\text{M}]^+$ , 166 (28), 152 (100), 91 (5), 77 (15), 65 (10), 51 (3).

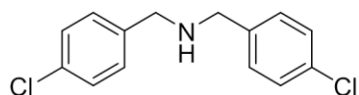

bis(4-chlorobenzyl)amine (colorless liquid)<sup>18</sup>

Isolated yield: 76%

$^1\text{H}$  NMR (600 MHz, Chloroform-d)  $\delta$  7.27 (d,  $J = 8.4$  Hz, 4H), 7.24 (d,  $J = 8.4$  Hz, 4H), 3.72 (s, 4H), 1.90 (s, 1H).

$^{13}\text{C}$  NMR (151 MHz, Chloroform-d)  $\delta$  138.53, 132.81, 129.56, 128.62, 52.35.

GC-MS:  $m/z$  (%) 265 (5)  $[\text{M}]^+$ , 140 (42), 125 (100), 89 (13), 77 (15), 63 (10), 51 (10).

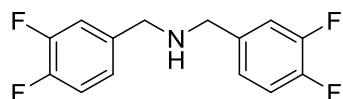

bis(3,4-difluorobenzyl)amine (colorless solid) (CAS: 1284842-52-9)

Isolated yield: 80%

$^1\text{H}$  NMR (600 MHz, Chloroform-d)  $\delta$  7.22 – 7.14 (m, 2H), 7.09 (dt,  $J = 10.1, 8.2$  Hz, 2H), 7.04 (dd,  $J = 8.0, 4.1$  Hz, 2H), 3.74 (s, 4H), 1.82 (s, 1H).

$^{13}\text{C}$  NMR (151 MHz, Chloroform-d)  $\delta$  151.27 (d,  $J = 12.5$  Hz), 149.63 (d,  $J = 12.9$  Hz), 148.72 (d,  $J = 12.8$  Hz), 137.18, 123.96, 117.03 (dd,  $J = 32.0, 17.2$  Hz), 52.05.

GC-MS:  $m/z$  (%) 269 (3)  $[\text{M}]^+$ , 136 (100), 121 (24), 106 (64), 94 (42), 77 (56), 65 (32), 51 (30).

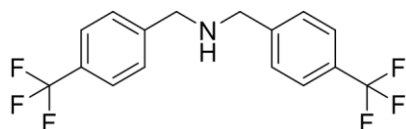

bis(4-(trifluoromethyl)benzyl)amine (colourless liquid)<sup>18</sup>

Isolated yield: 83%

$^1\text{H}$  NMR (600 MHz, Chloroform-d)  $\delta$  7.59 (d,  $J = 8.2$  Hz, 4H), 7.47 (d,  $J = 8.1$  Hz, 4H), 3.86 (s, 4H), 1.95 (s, 1H).

$^{13}\text{C}$  NMR (151 MHz, Chloroform-d)  $\delta$  144.11, 129.56 (d,  $J = 35.9$  Hz), 128.47, 126.87 (d,  $J = 18.5$  Hz), 125.51, 52.69.

GC-MS:  $m/z$  (%) 333 (1)  $[\text{M}]^+$ , 142 (32), 127 (100), 101 (15), 77 (5), 63 (8), 51 (2).

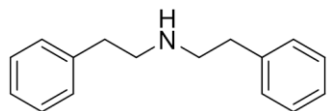

Diphenethylamine (yellowish liquid)<sup>18</sup>

Isolated yield: 89%

$^1\text{H}$  NMR (600 MHz, Chloroform-d)  $\delta$  7.25 (t,  $J = 7.5$  Hz, 4H), 7.22 – 7.17 (m, 2H), 7.15 (d,  $J = 8.0$  Hz, 4H), 2.93 (s, 4H), 2.77 (t,  $J = 7.1$  Hz, 4H), 1.54 (s, 1H).

$^{13}\text{C}$  NMR (151 MHz, Chloroform-d)  $\delta$  140.01, 128.74, 128.52, 126.20, 50.95, 36.46.

GC-MS:  $m/z$  (%) 225 (8)  $[\text{M}]^+$ , 134 (95), 105 (100), 77 (27), 65 (16), 51 (14).

# Copies of $^1\text{H}$ and $^{13}\text{C}$ NMR spectra :

## Primary amines

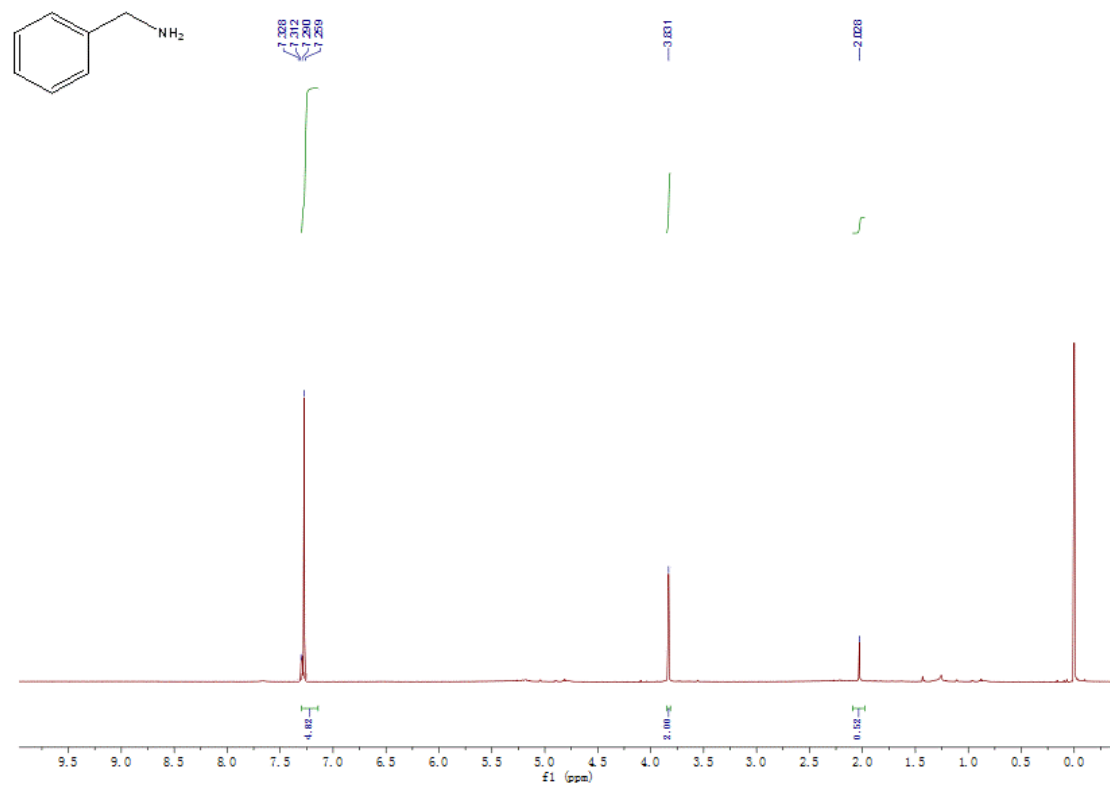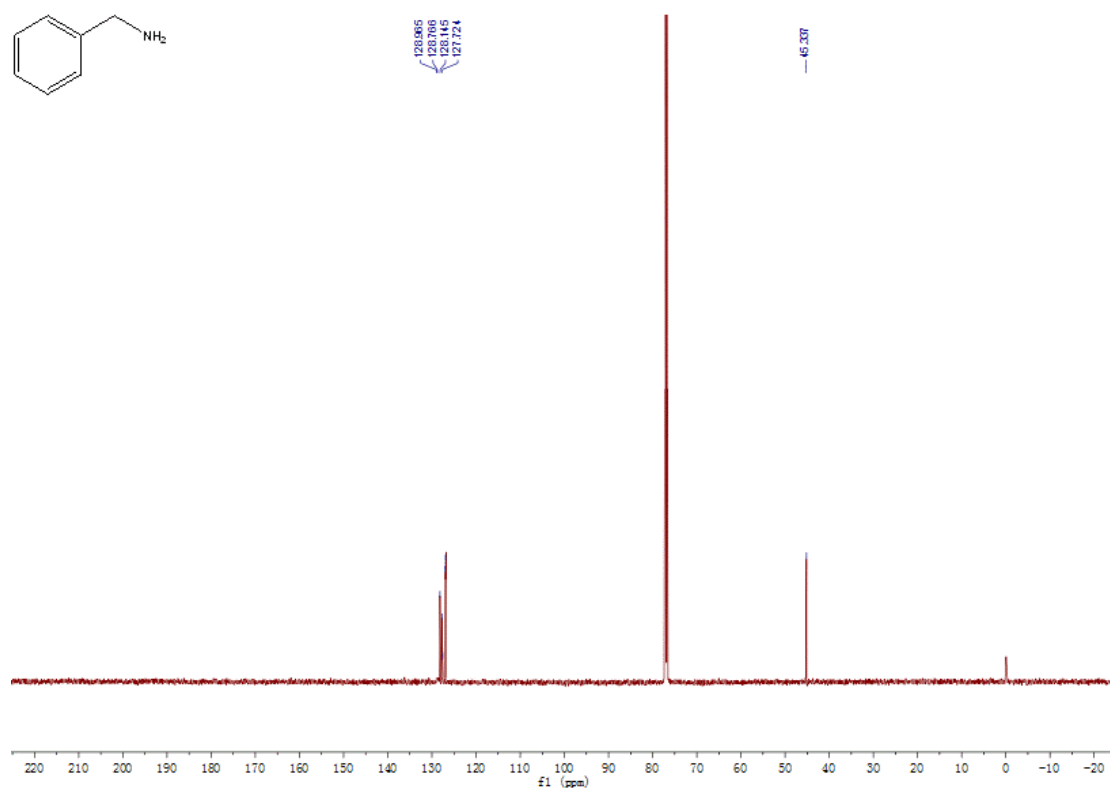

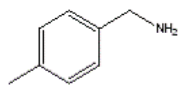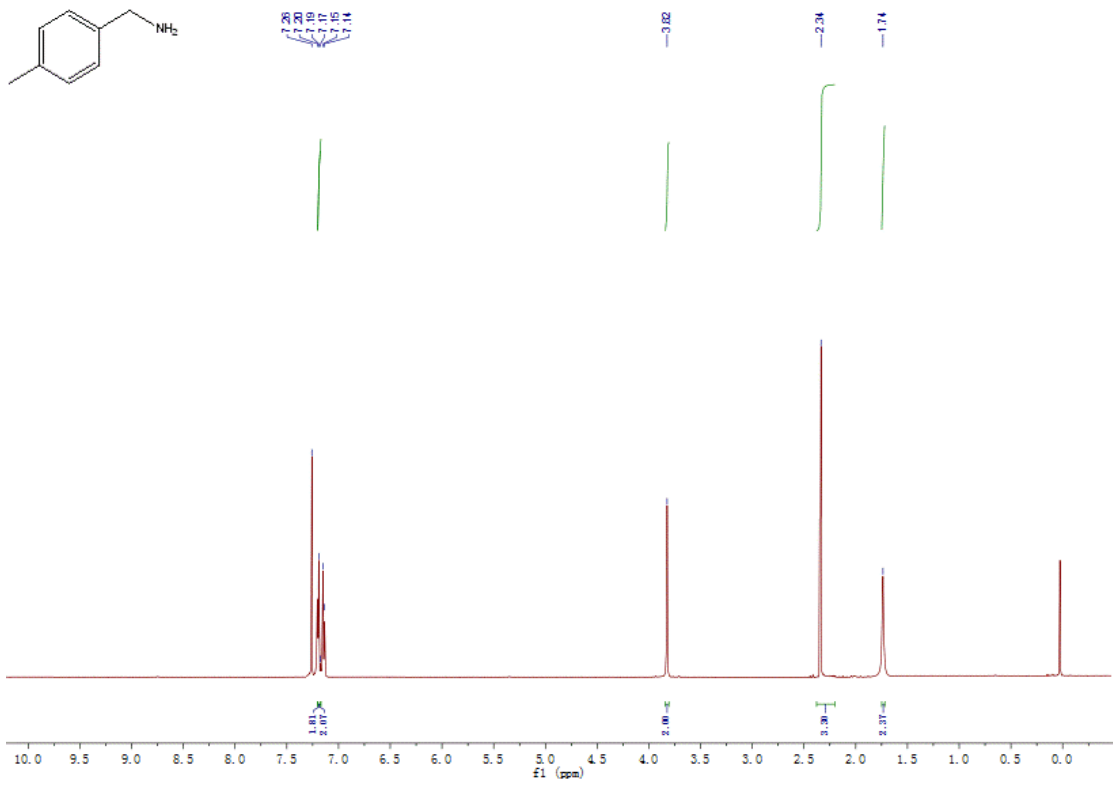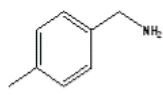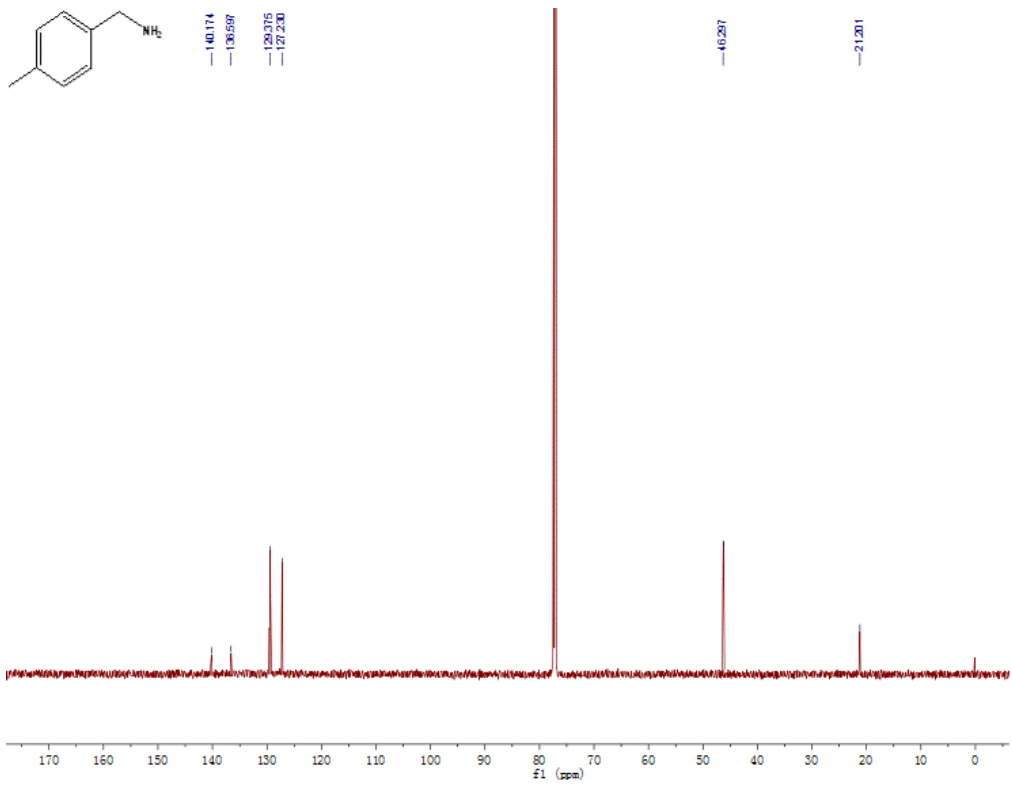

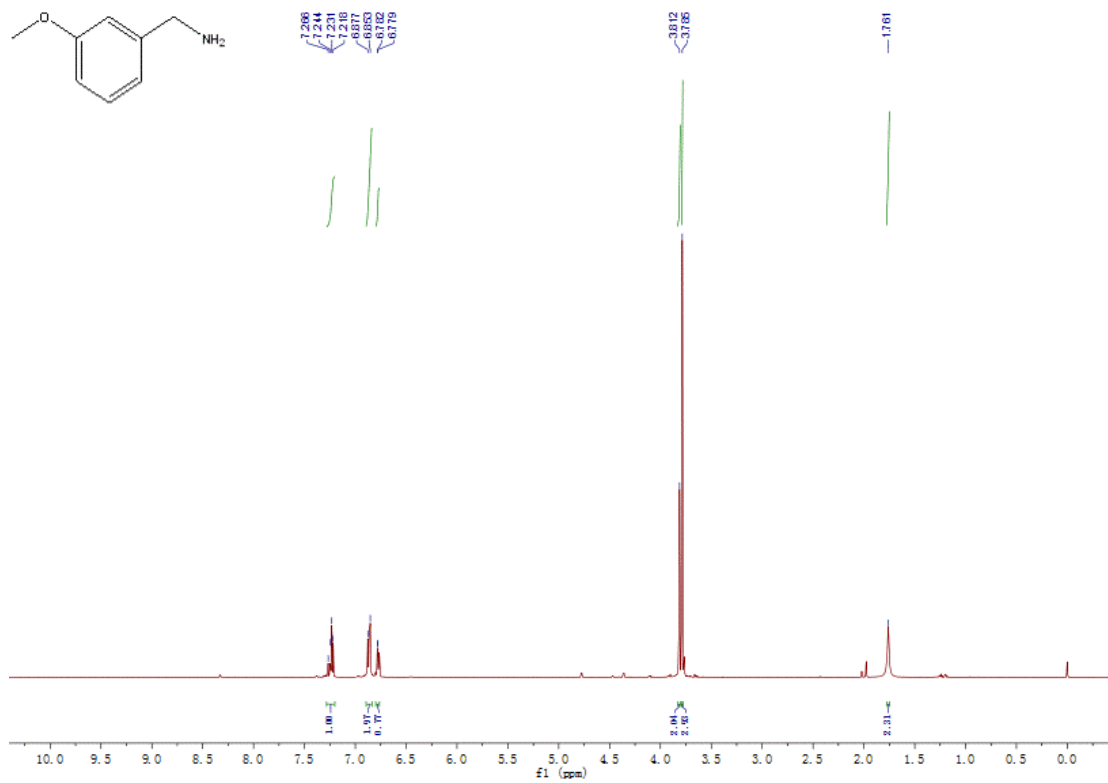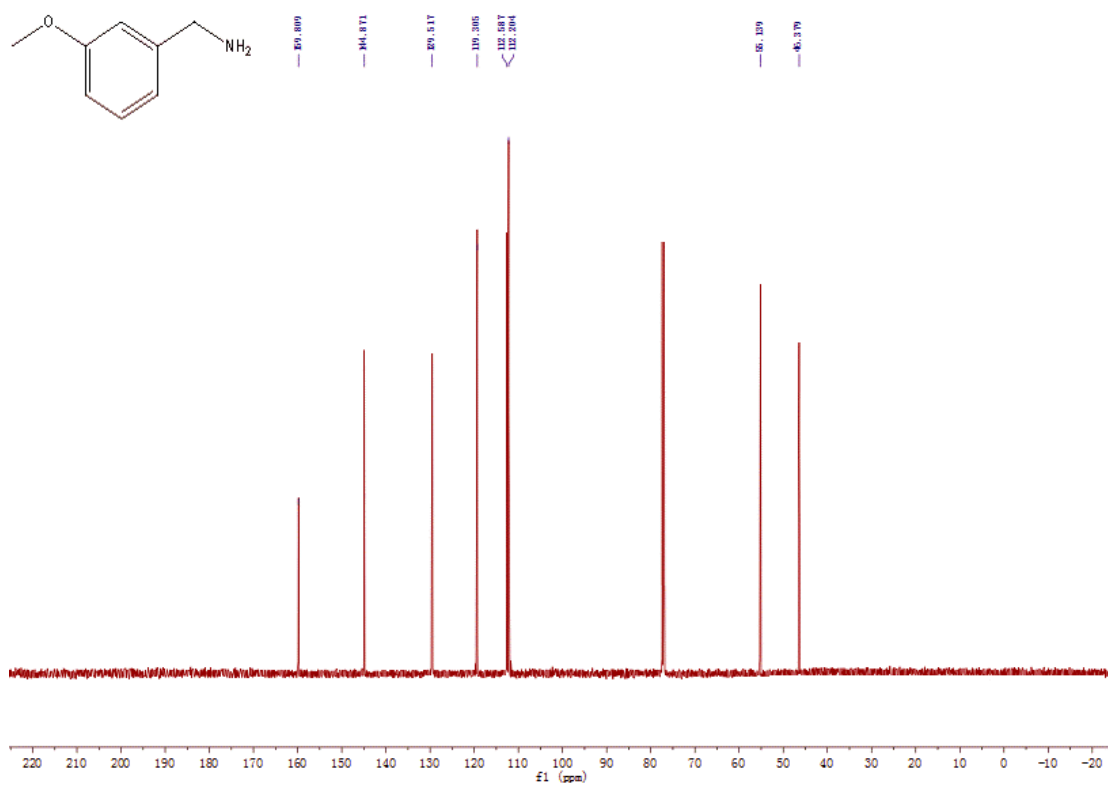



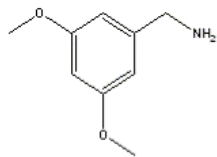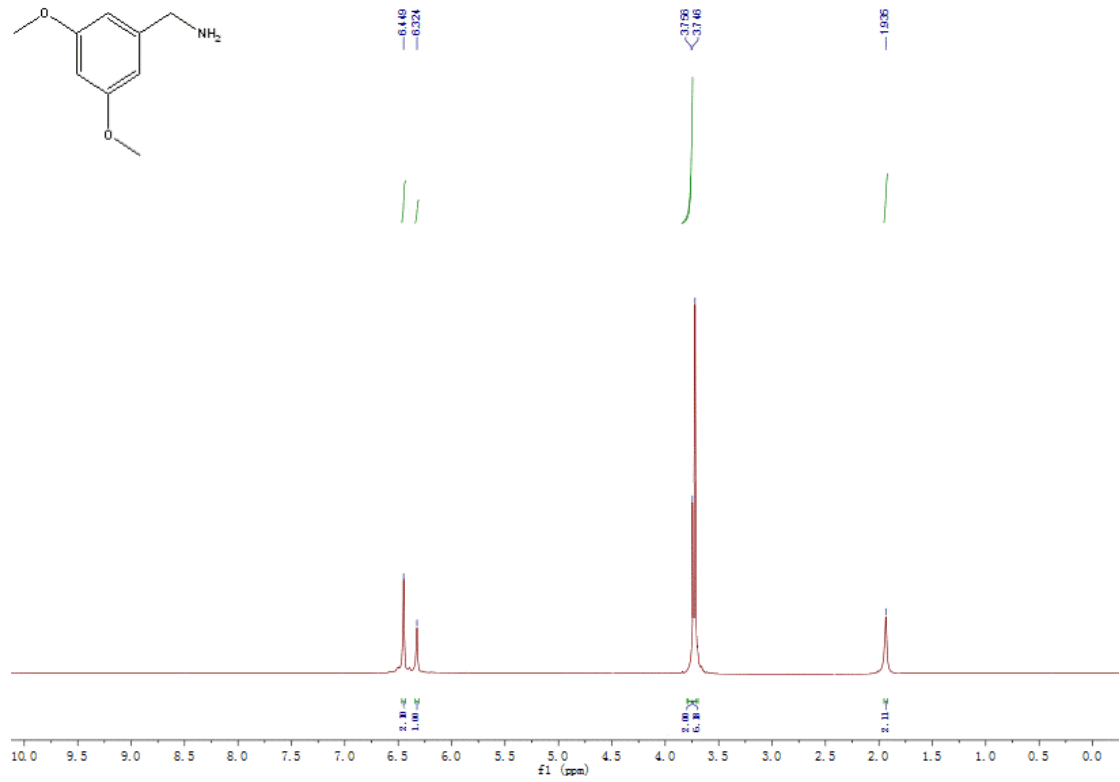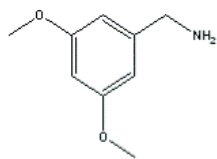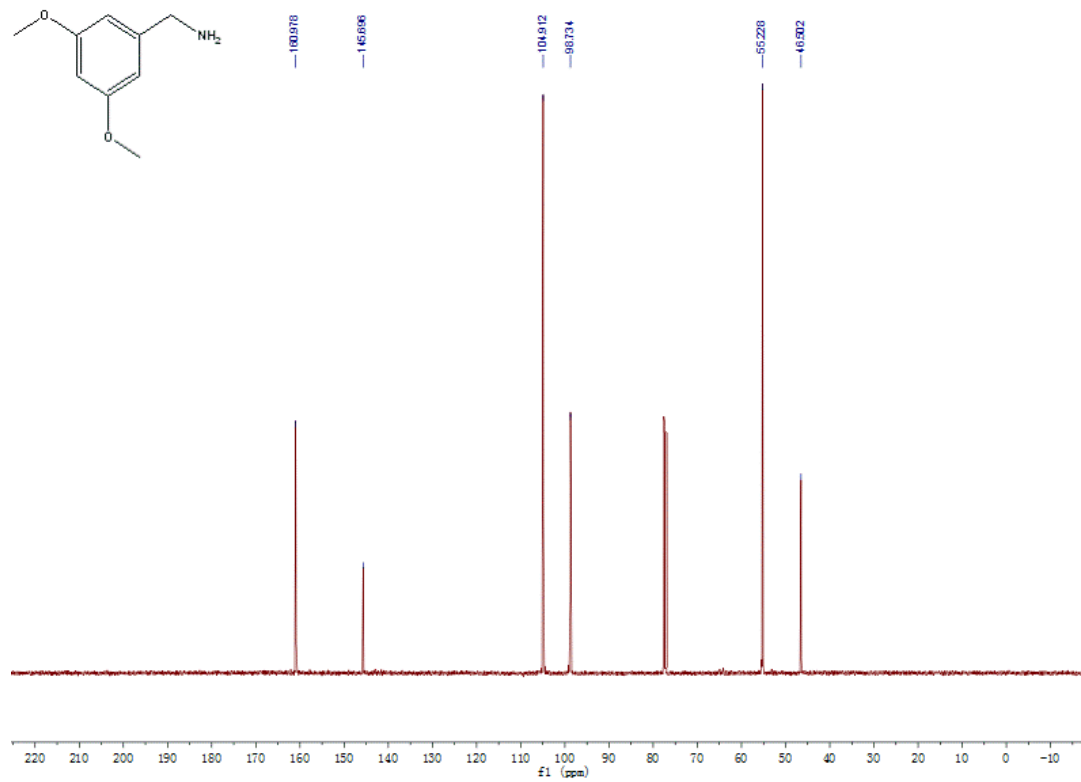

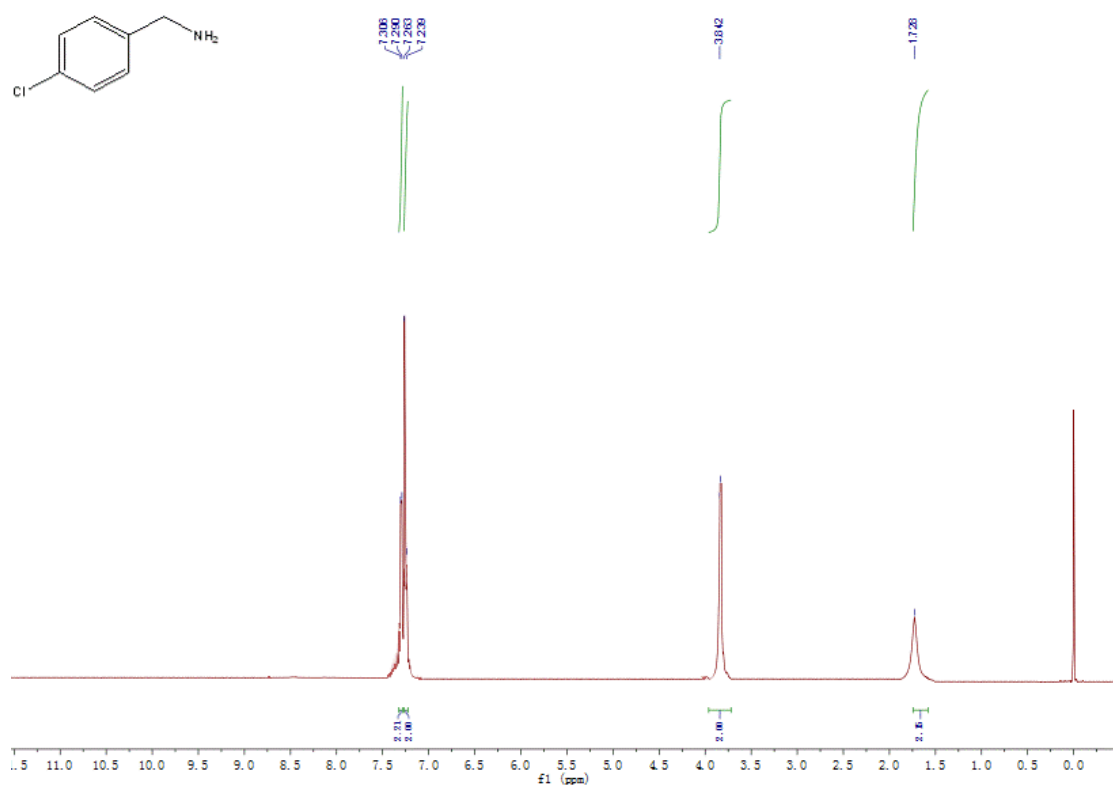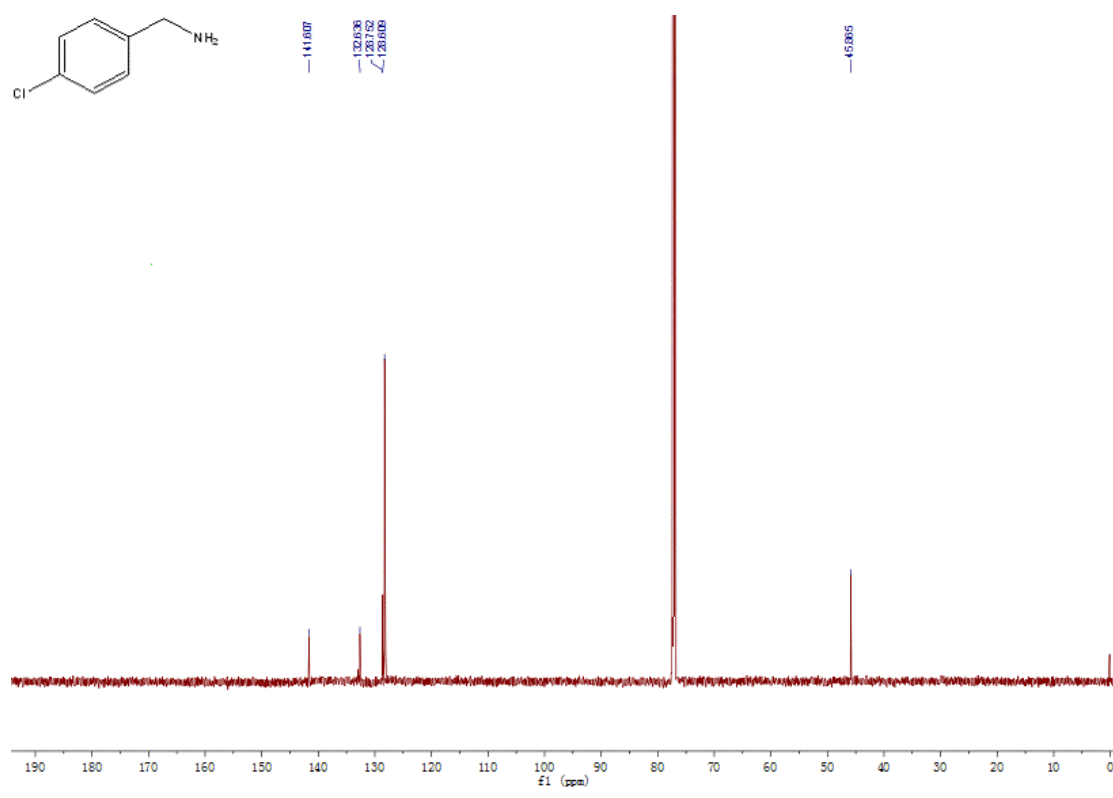

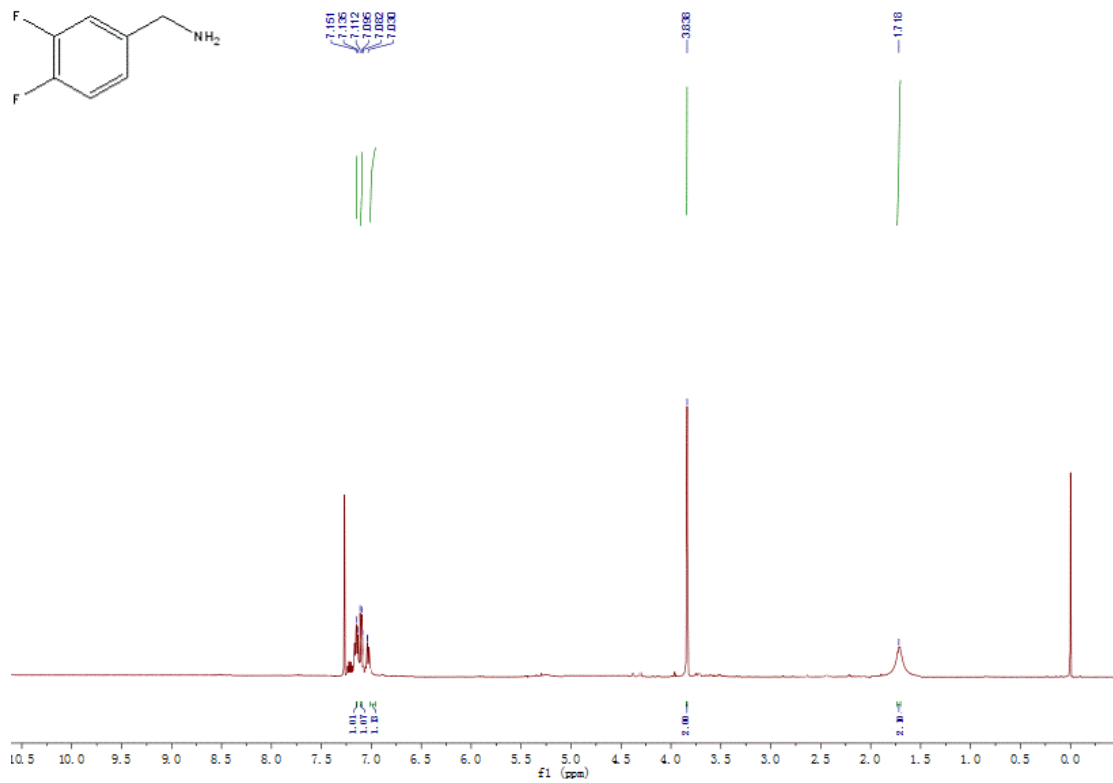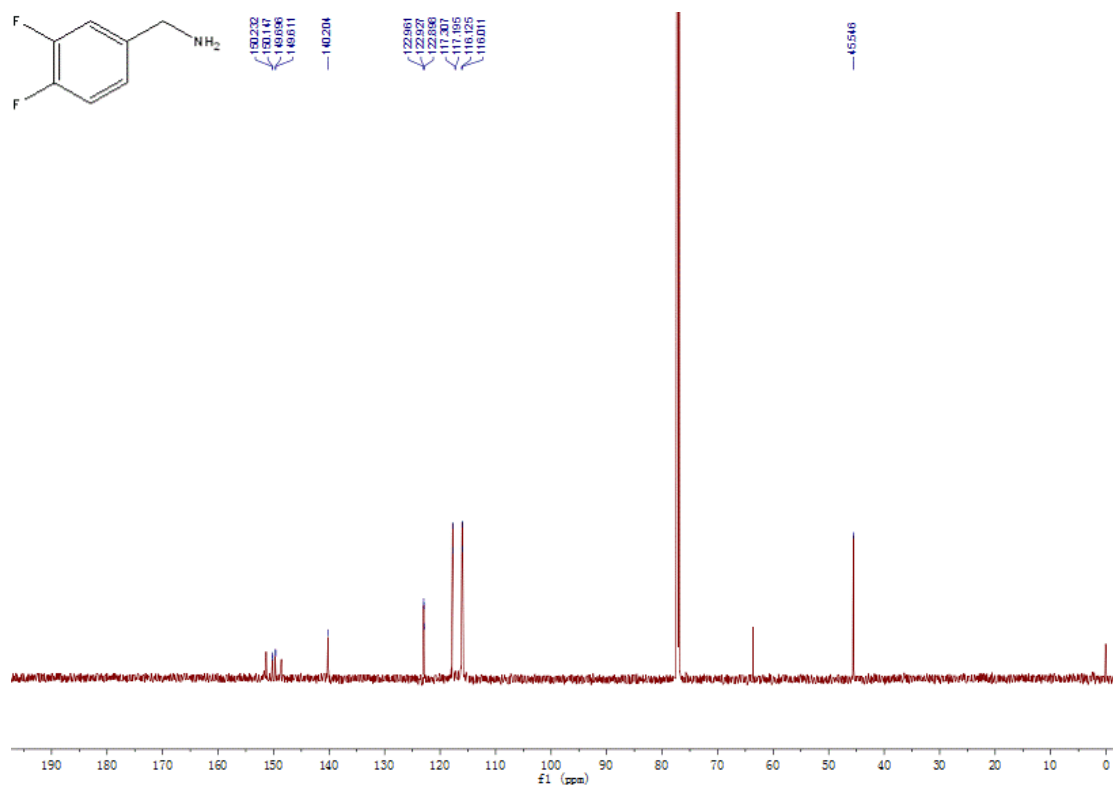

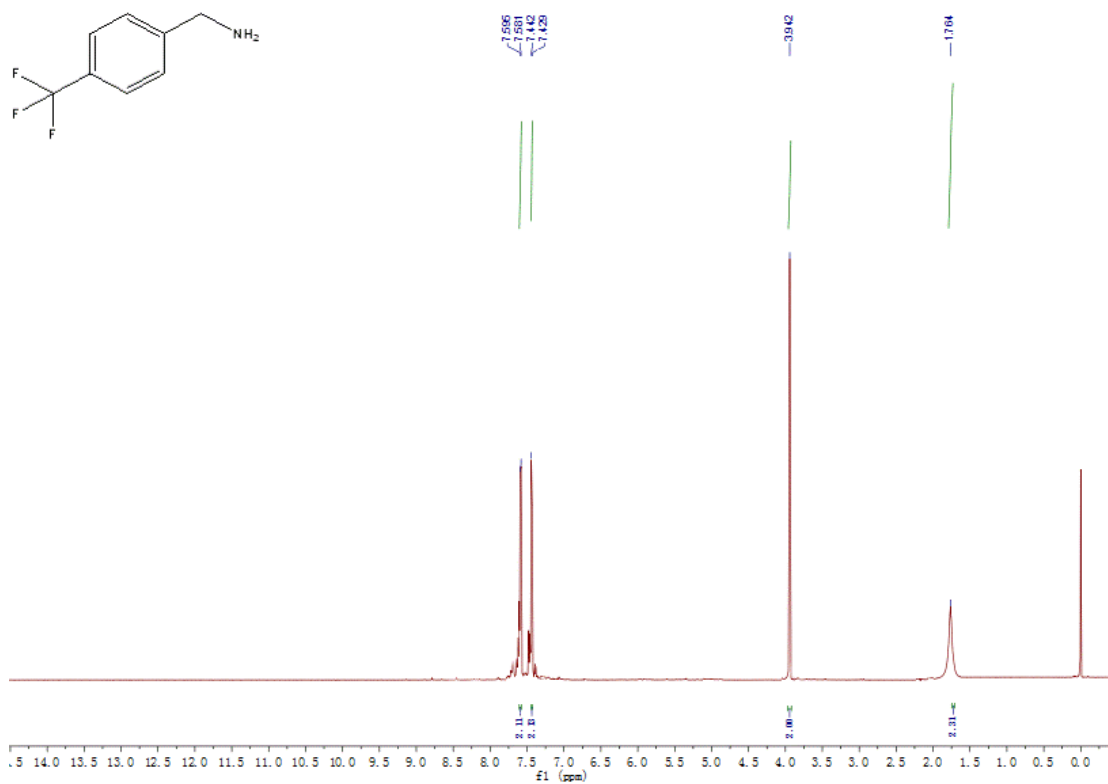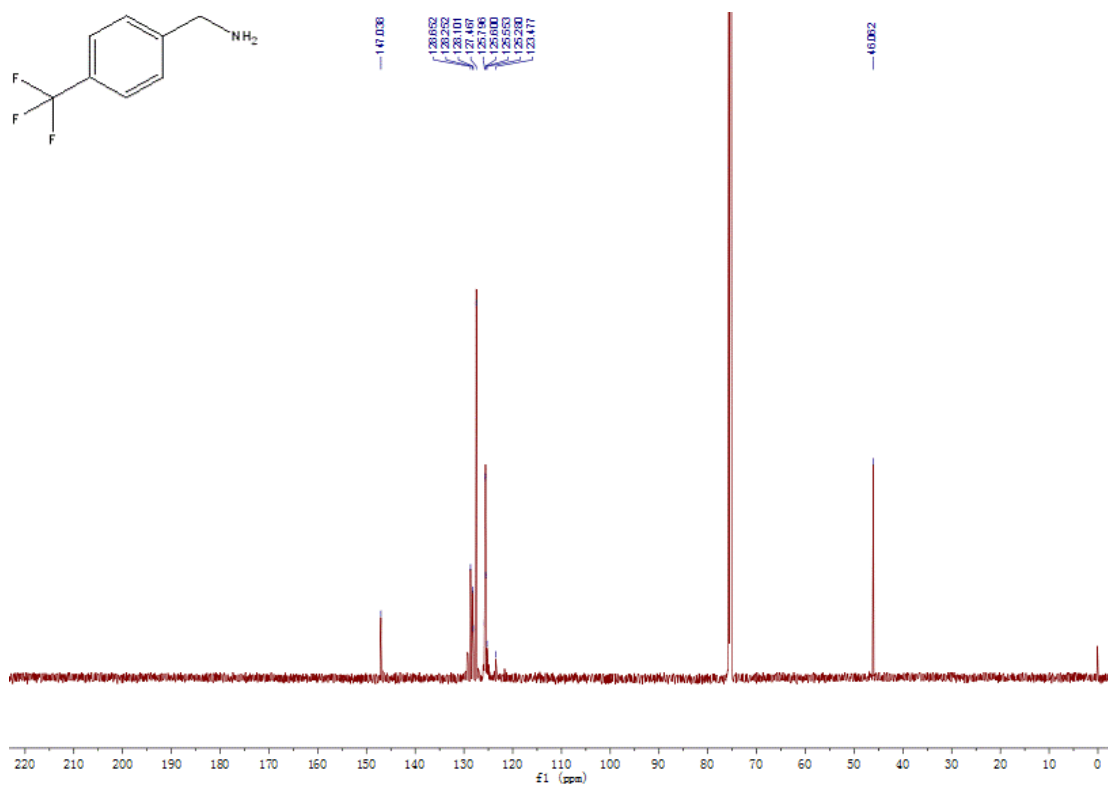

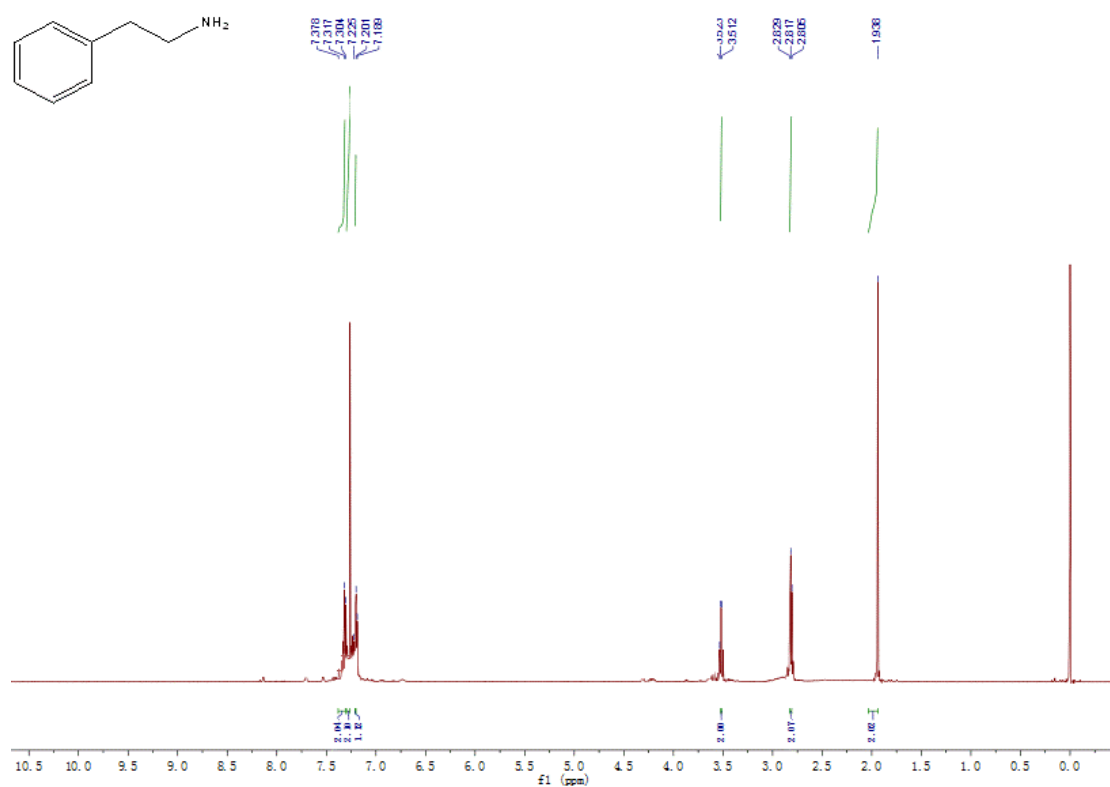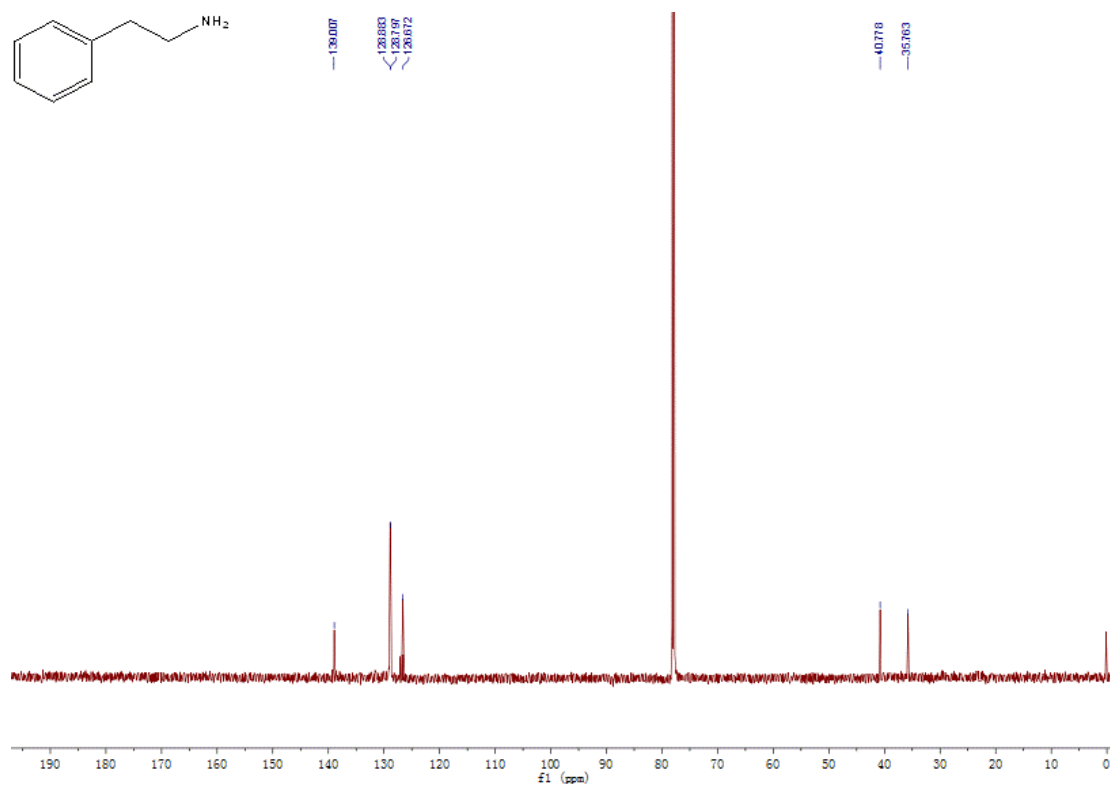

## Secondary amines

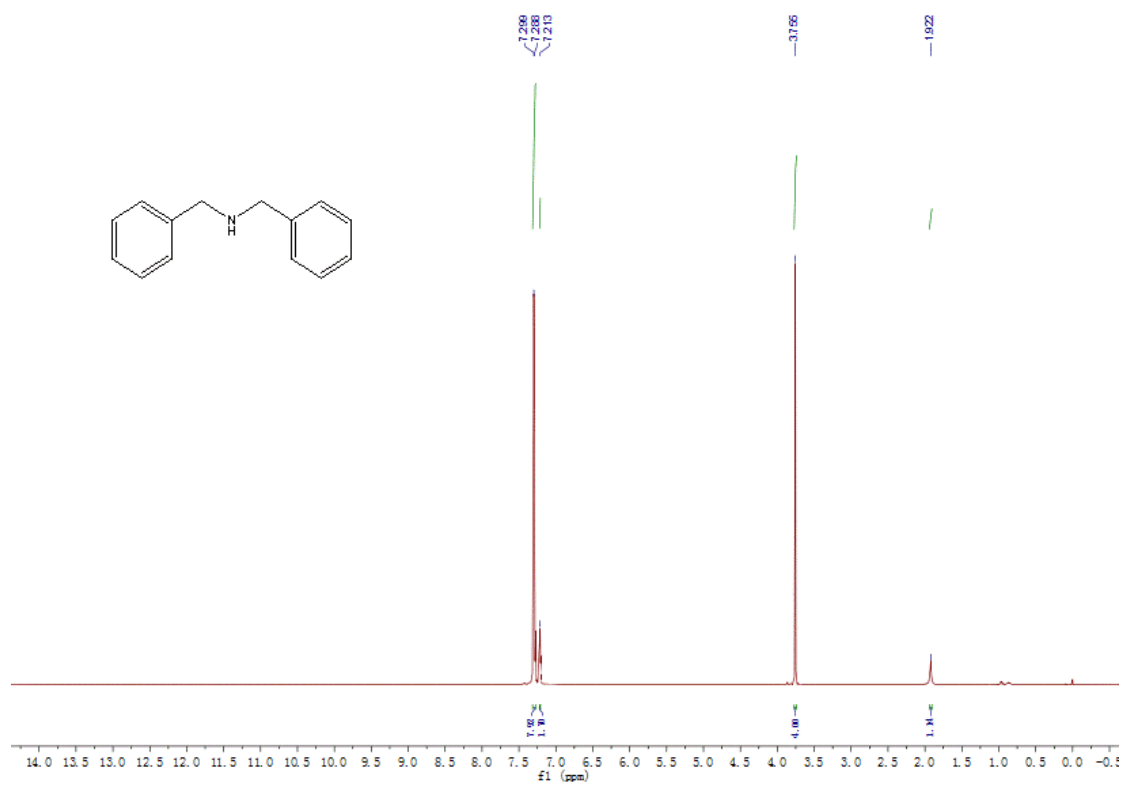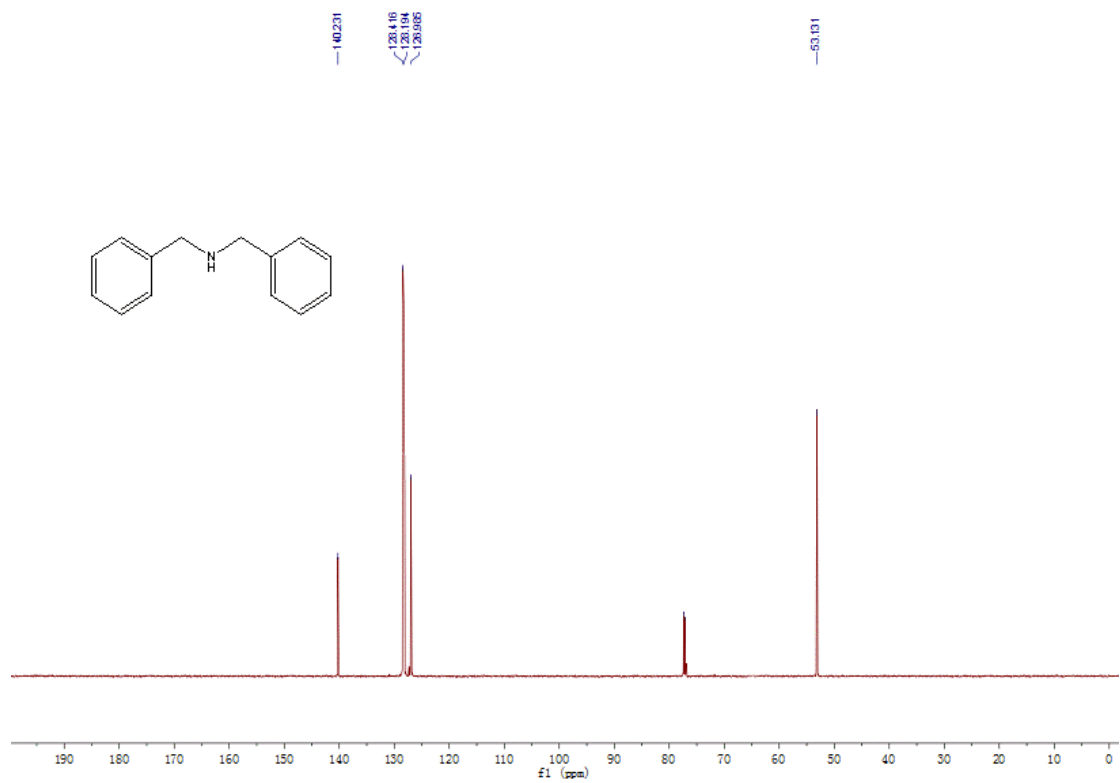

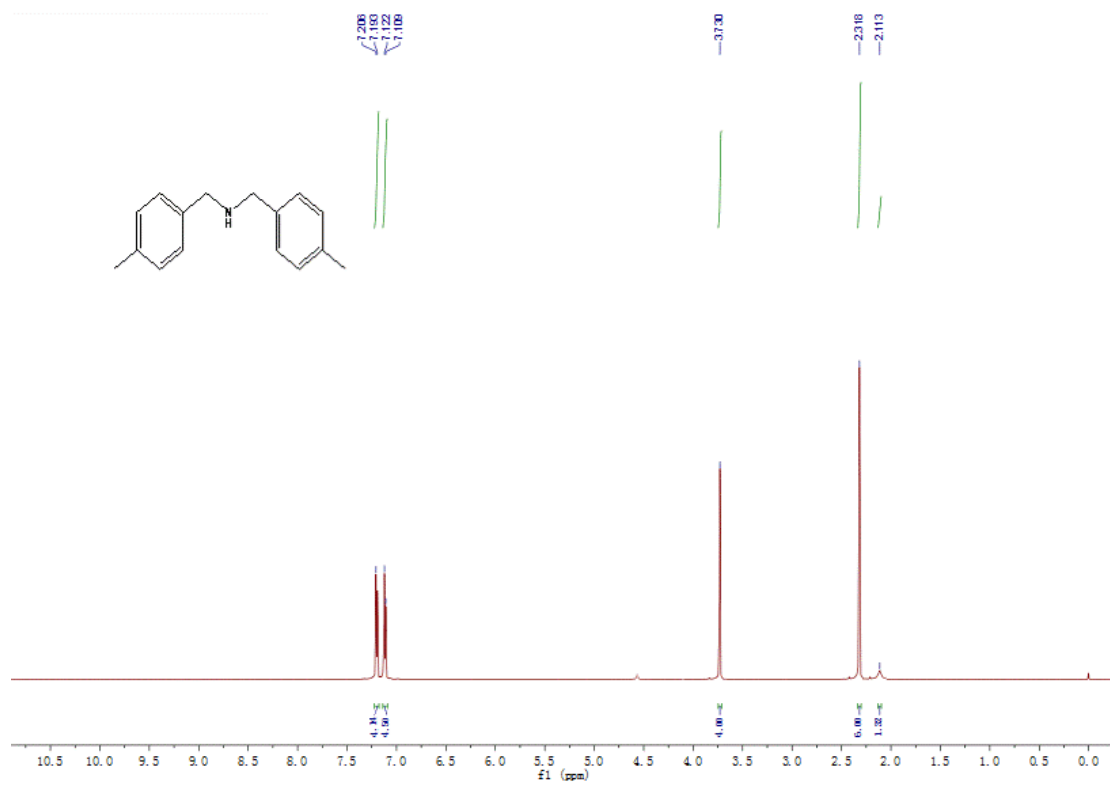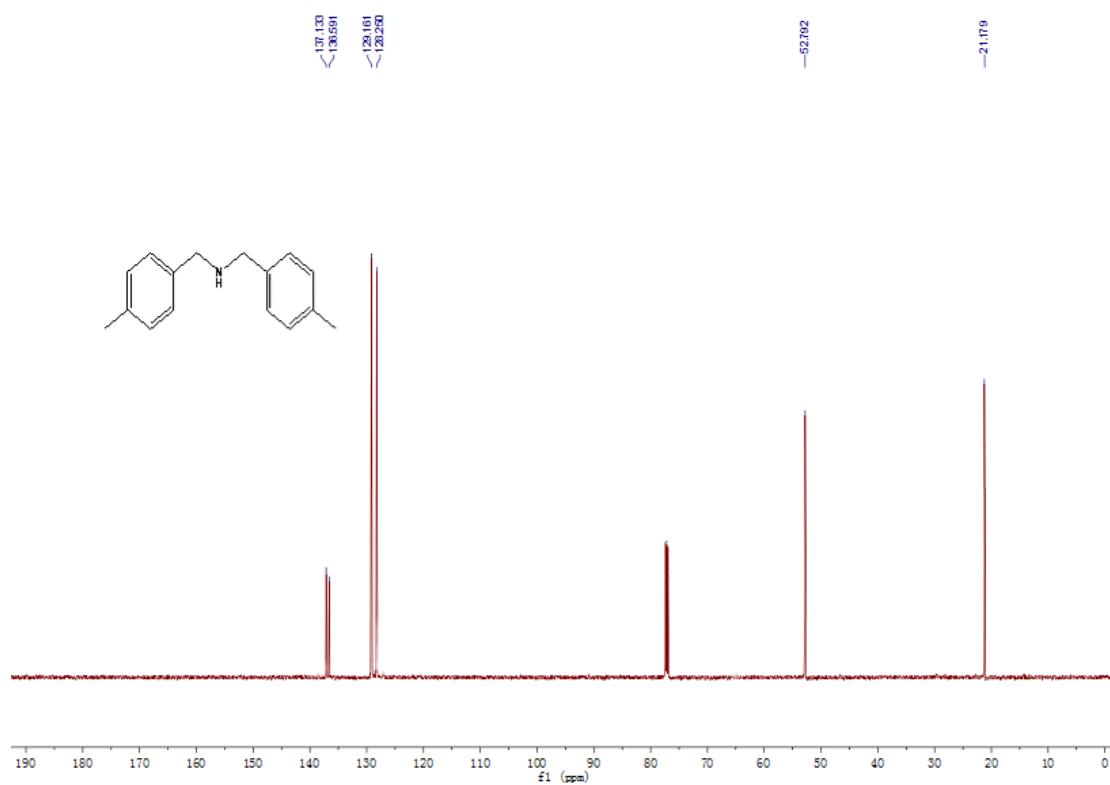

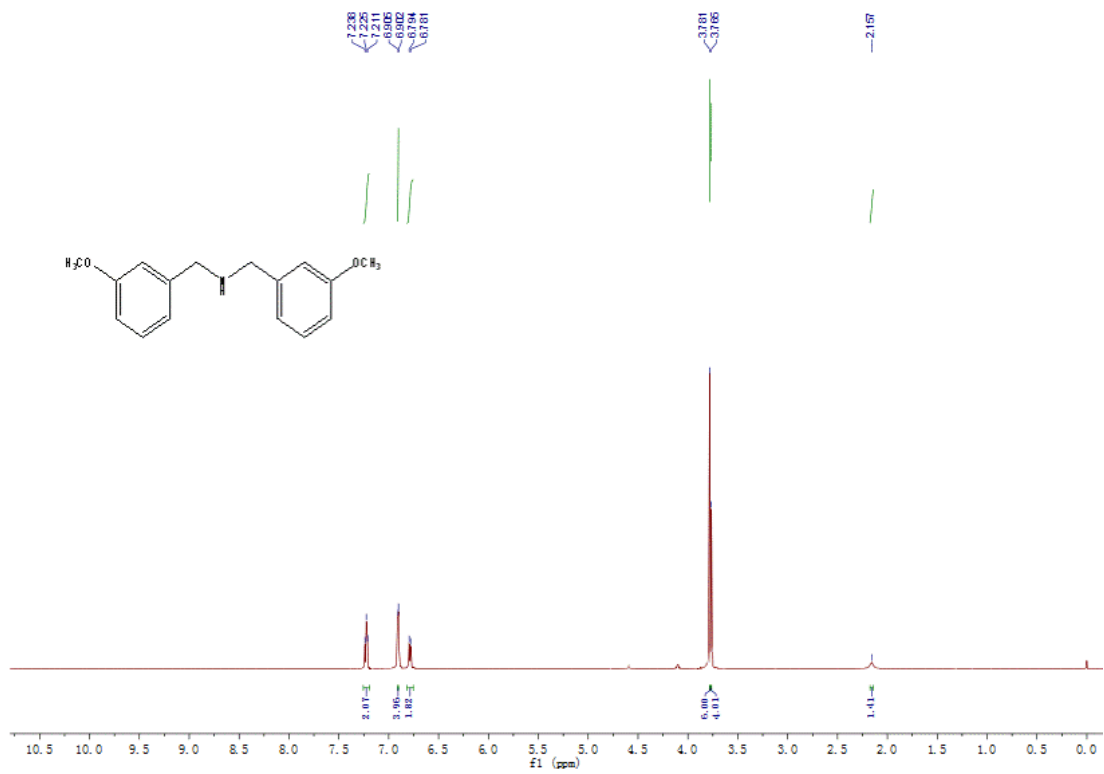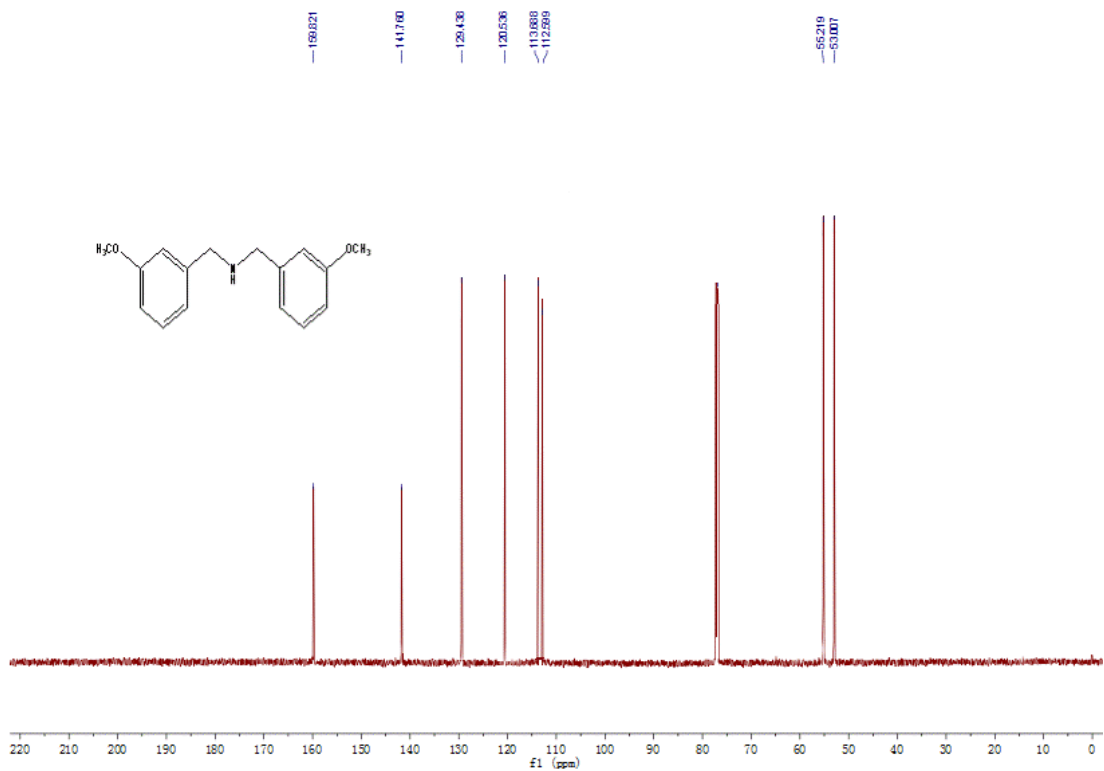



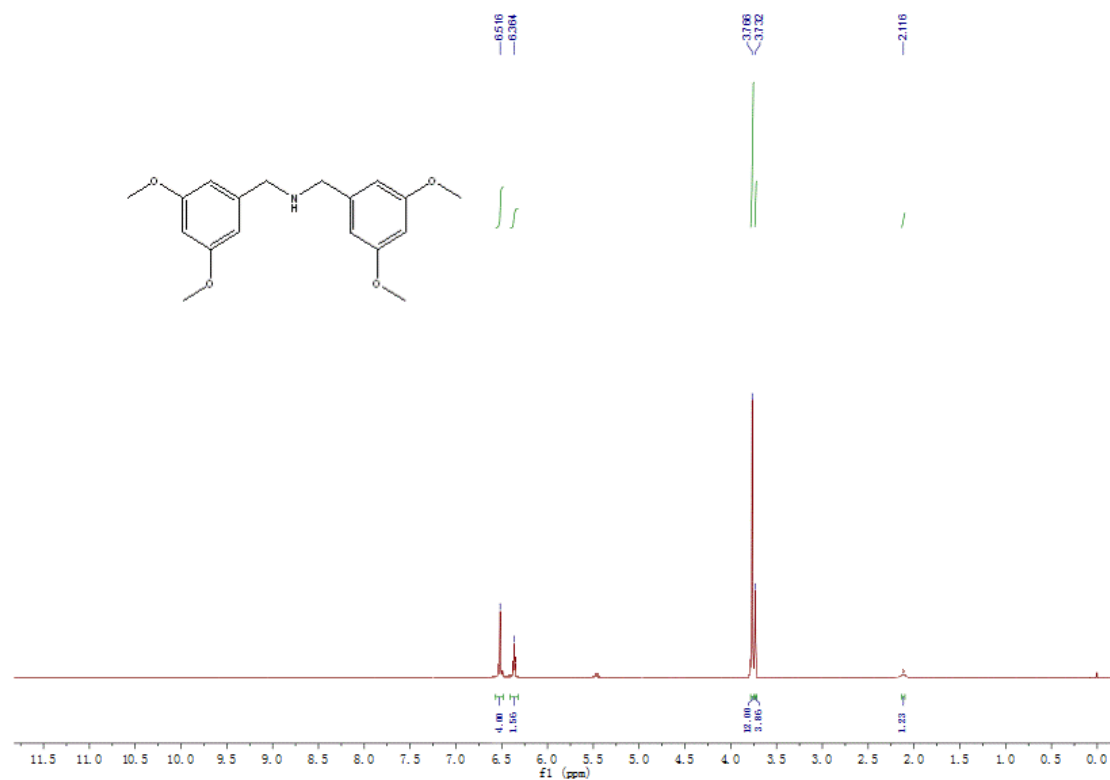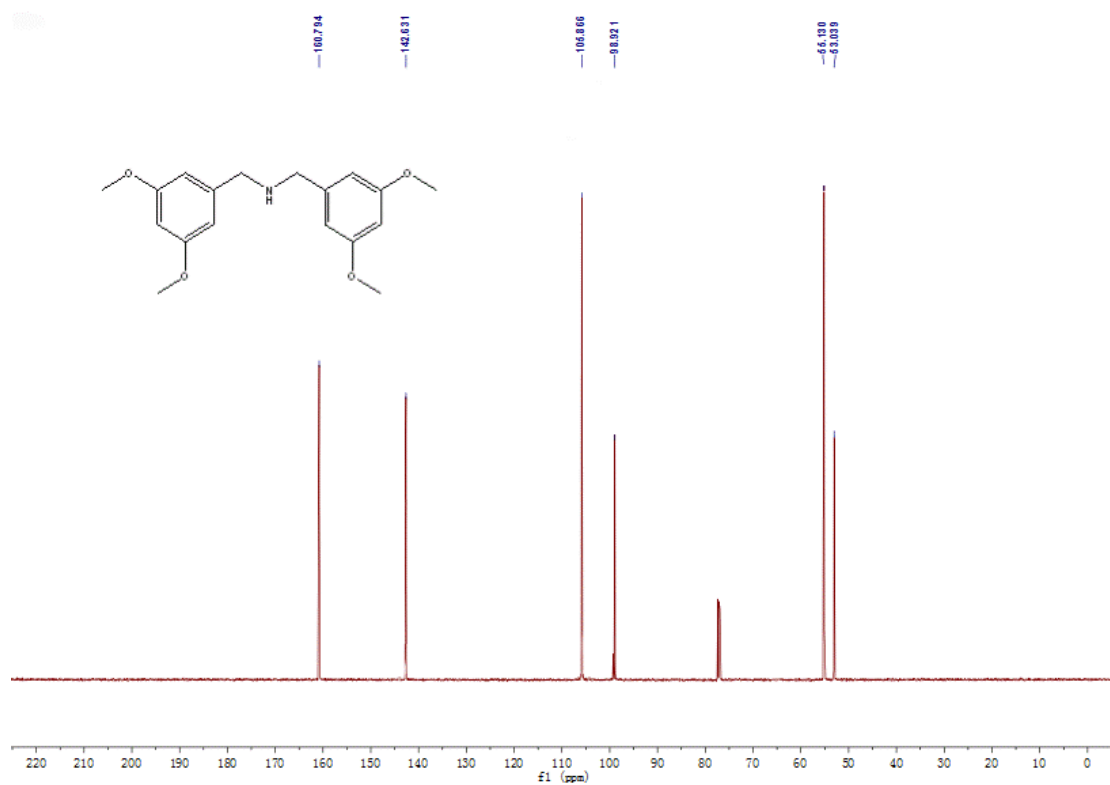

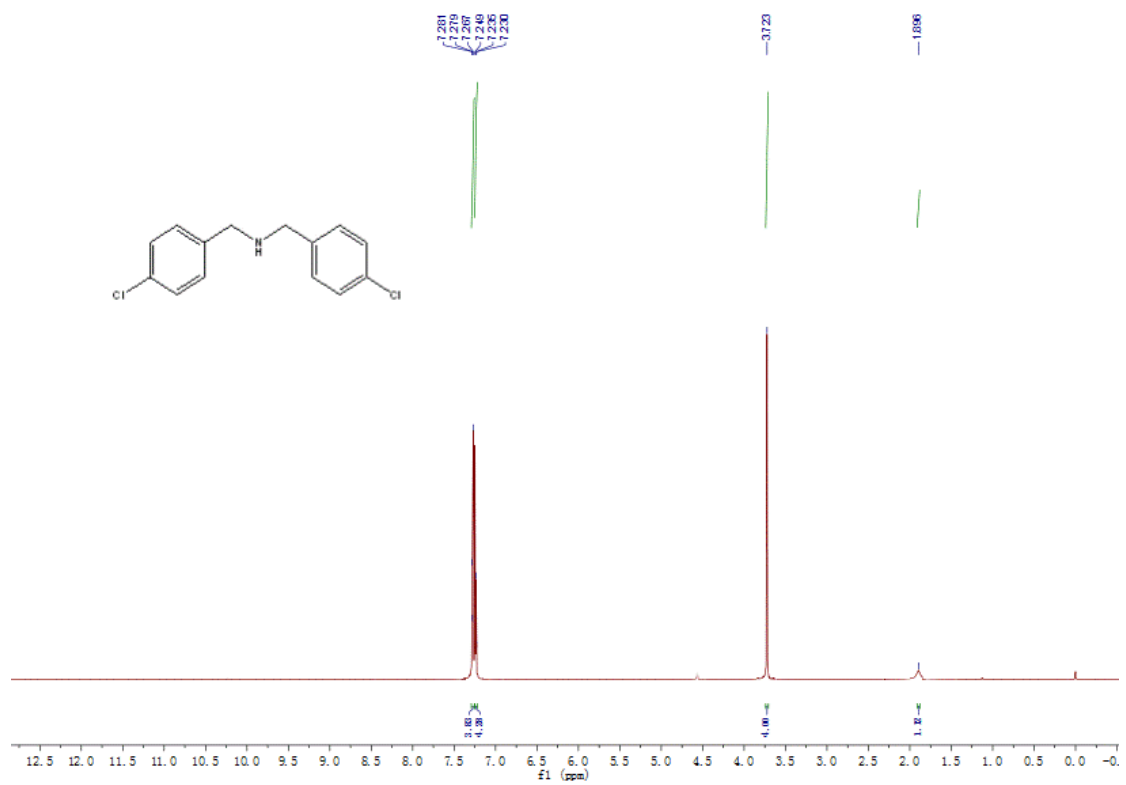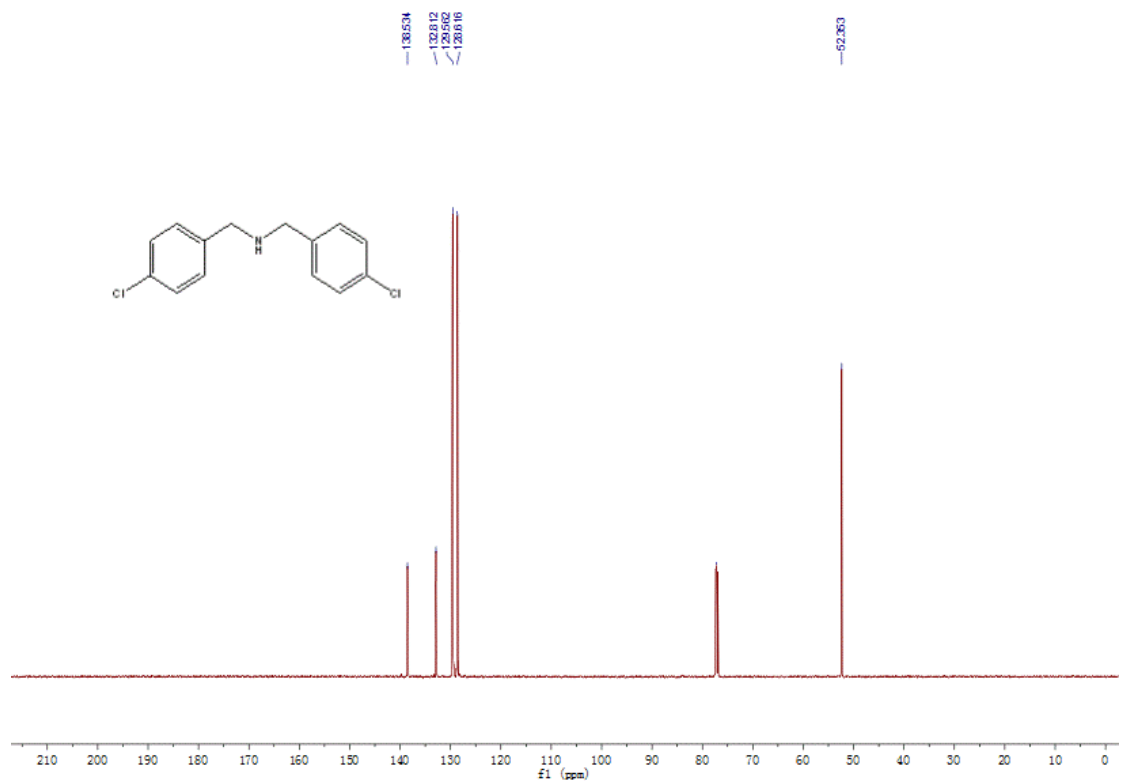

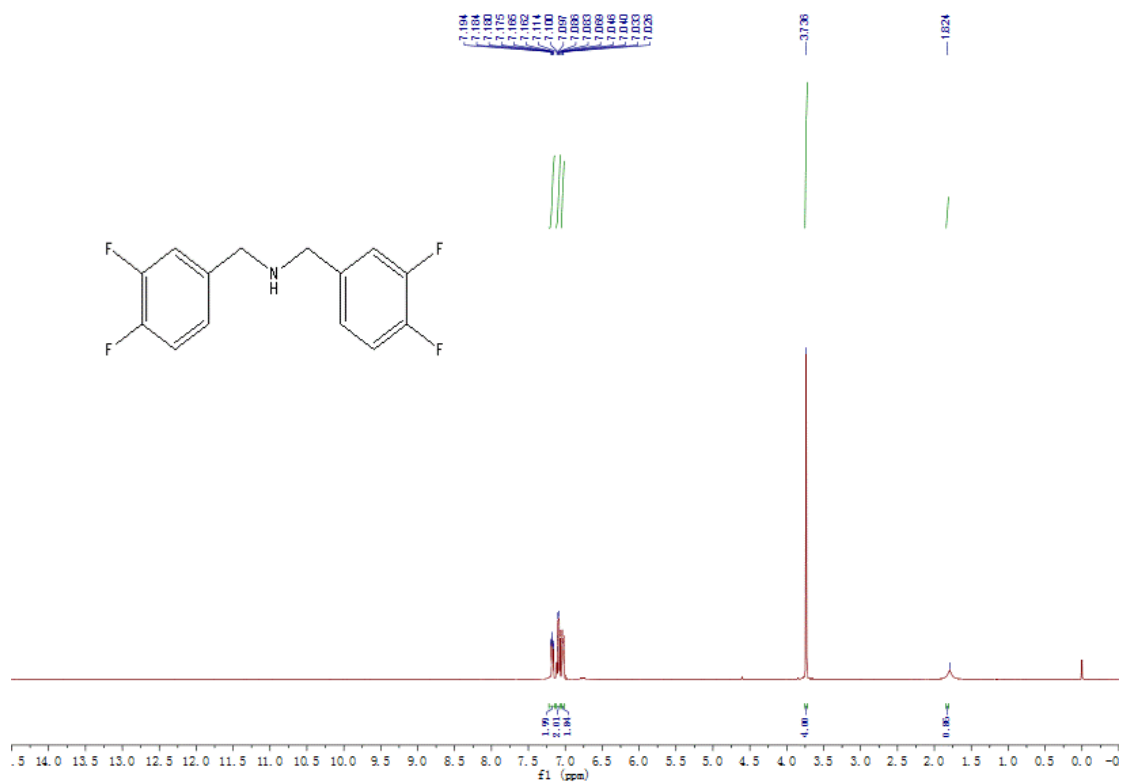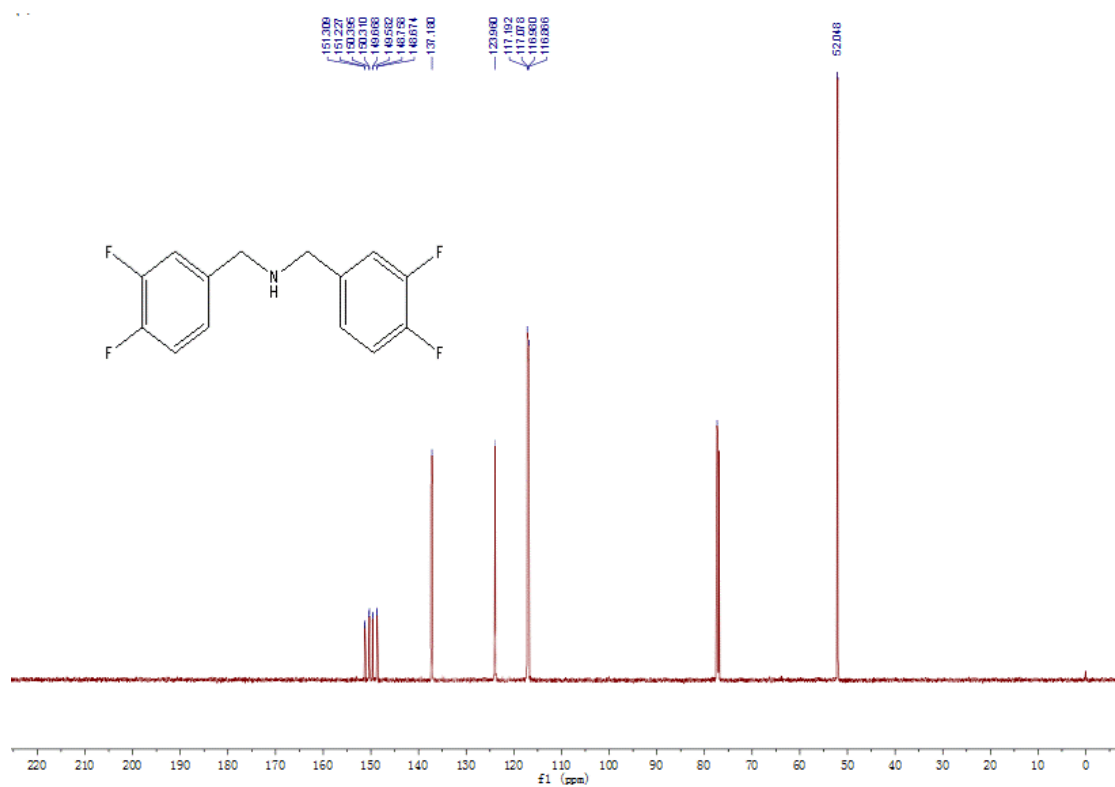

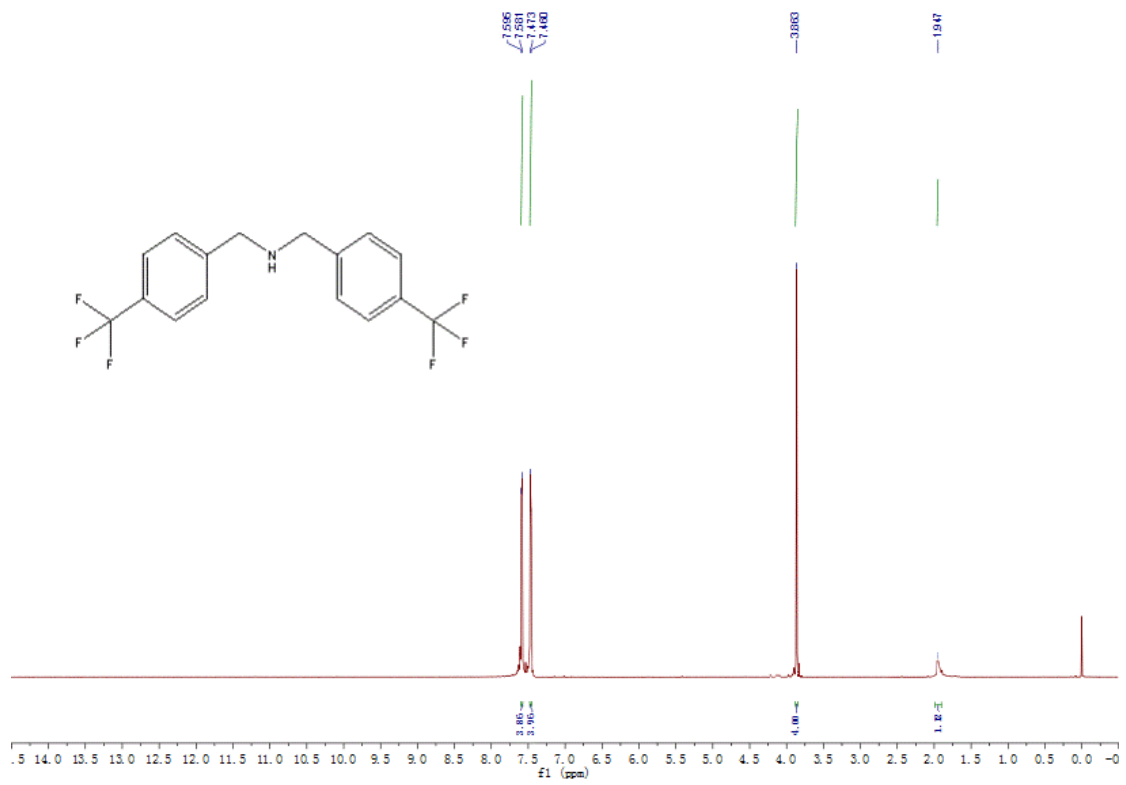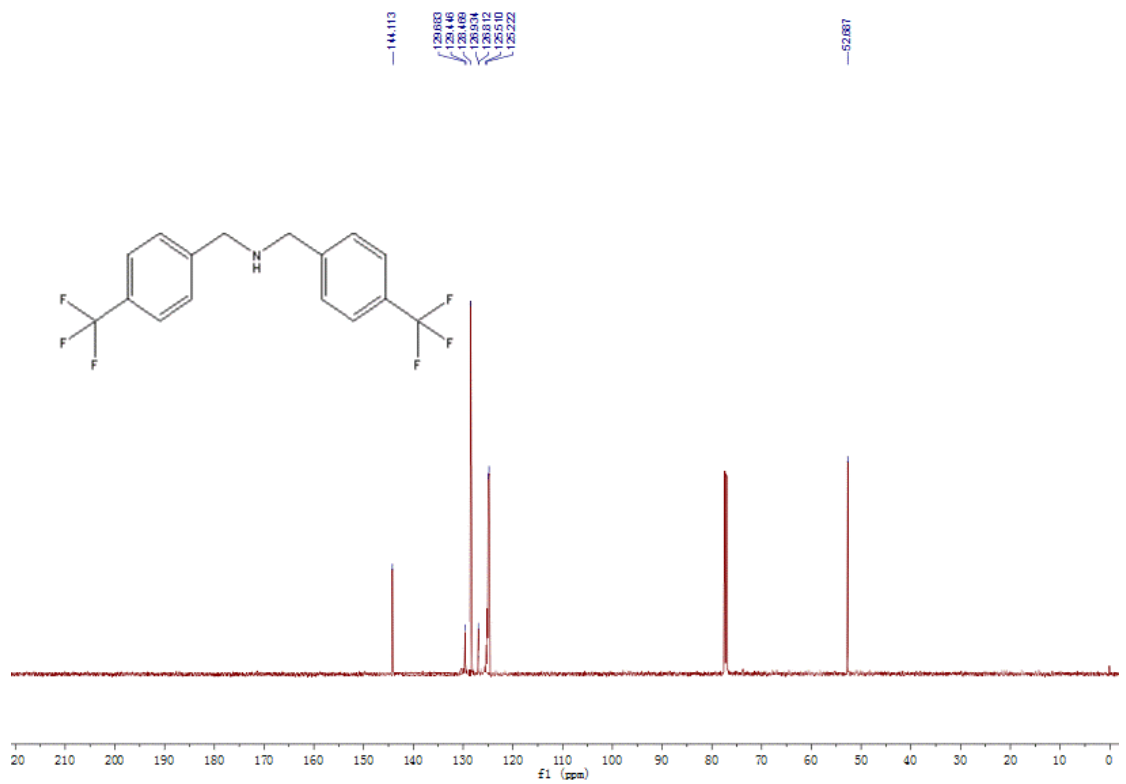

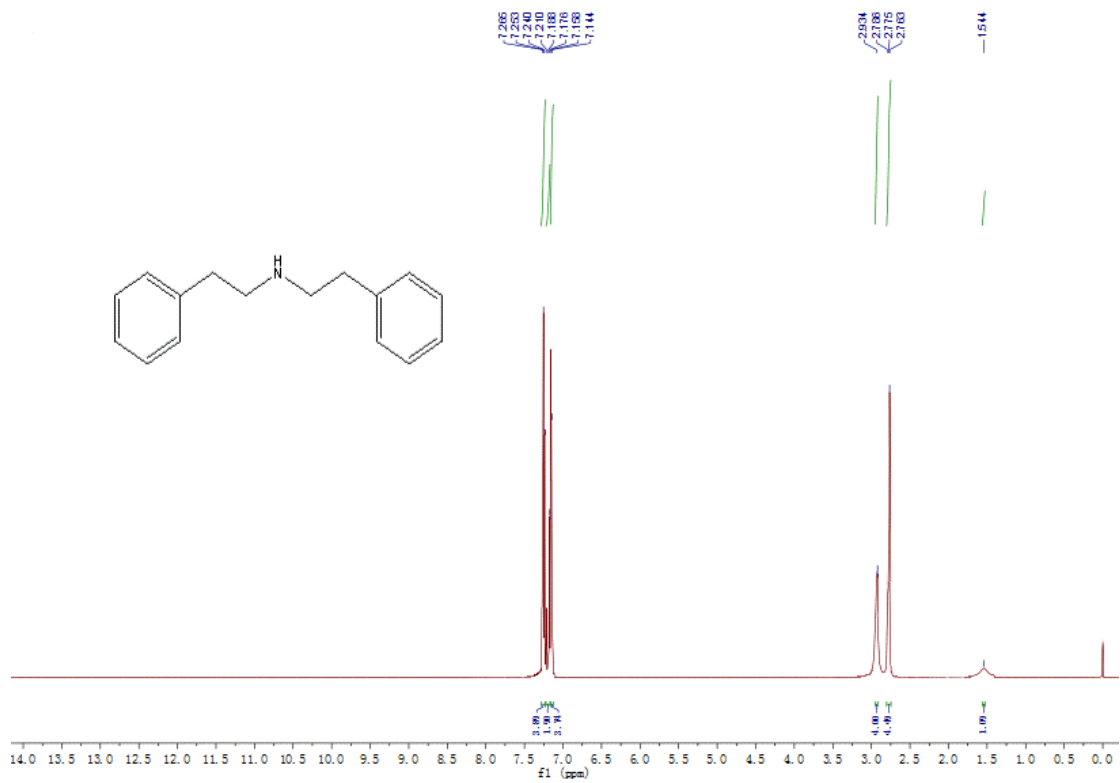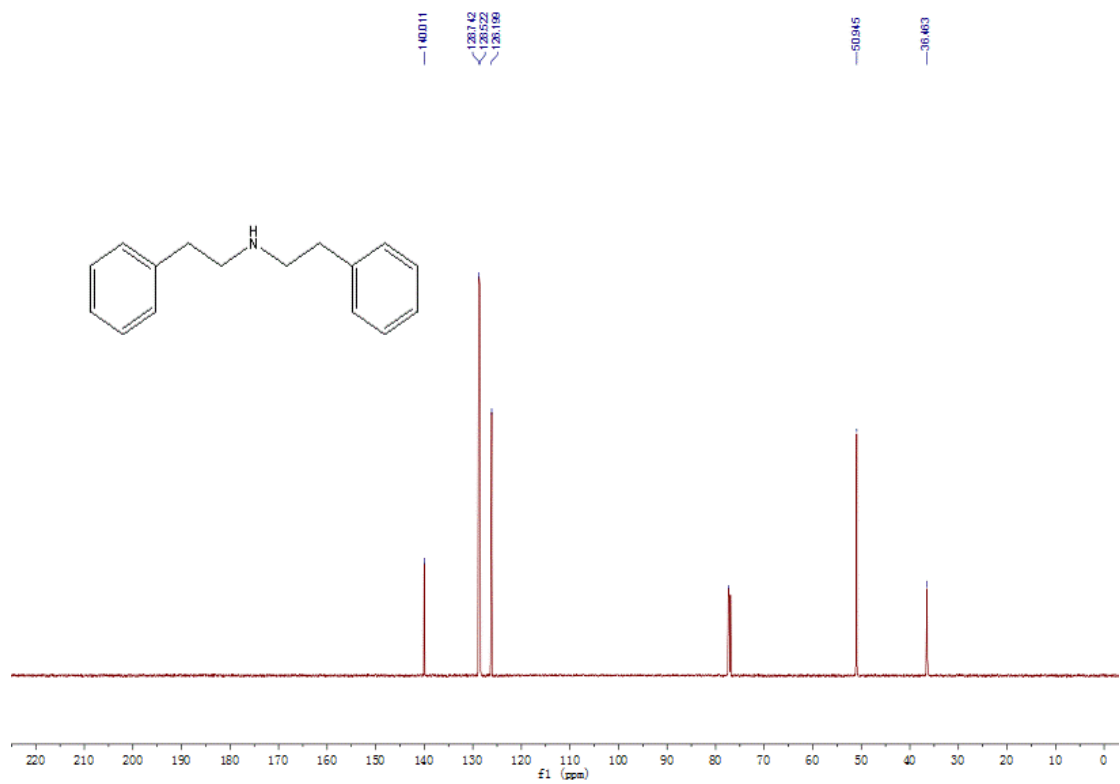

## Supplementary reference

1. Dai C, *et al.* Efficient and selective hydrogenation of benzonitrile to benzylamine: improvement on catalytic performance and stability in a trickle-bed reactor. *New J. Chem.* **41**, 3758-3765 (2017).
2. McMillan L, *et al.* The application of a supported palladium catalyst for the hydrogenation of aromatic nitriles. *J. Mol. Catal. a-Chem.* **411**, 239-246 (2016).
3. Hegedus L, Mathe T. Selective heterogeneous catalytic hydrogenation of nitriles to primary amines in liquid phase Part I. Hydrogenation of benzonitrile over palladium. *Appl. Catal. A* **296**, 209-215 (2005).
4. Dai C, Li Y, Ning C, Zhang W, Wang X, Zhang C. The influence of alumina phases on the performance of Pd/Al<sub>2</sub>O<sub>3</sub> catalyst in selective hydrogenation of benzonitrile to benzylamine. *Appl. Catal. A* **545**, 97-103 (2017).
5. Wang H, *et al.* Quasi Pd<sub>1</sub>Ni single-atom surface alloy catalyst enables hydrogenation of nitriles to secondary amines. *Nat. Commun.* **10**, (2019).
6. Greenfield H. HYDROGENATION OF BENZONITRILE TO DIBENZYLAMINE. *Ind. Eng. Chem. Prod. Res. Dev.* **15**, 156-158 (1976).
7. Paul H, Basu S, Bhaduri S, Lahiri GK. Platinum carbonyl derived catalysts on inorganic and organic supports: a comparative study. *J. Organomet. Chem.* **689**, 309-316 (2004).
8. Rylander PN, Hasbrouck L, Karpenko I. Coupling reactions of nitriles and anilines during hydrogenation. *Ann. N.Y. Acad. Sci.* **214**, 100-109 (1973).
9. Chatterjee M, Kawanami H, Sato M, Ishizaka T, Yokoyama T, Suzuki T. Hydrogenation of nitrile in supercritical carbon dioxide: a tunable approach to amine selectivity. *Green Chem.* **12**, 87-93 (2010).
10. Ortiz-Cervantes C, Iyanez I, Garcia JJ. Facile preparation of ruthenium nanoparticles with activity in hydrogenation of aliphatic and aromatic nitriles to amines. *J. Phys. Org. Chem.* **25**, 902-907 (2012).
11. Muratsugu S, *et al.* Formation and nitrile hydrogenation performance of Ru nanoparticles on a K-doped Al<sub>2</sub>O<sub>3</sub> surface. *Phys. Chem. Chem. Phys.* **17**, 24791-24802 (2015).
12. Lopez-De Jesus YM, Johnson CE, Monnier JR, Williams CT. Selective Hydrogenation of Benzonitrile by Alumina-Supported Ir-Pd Catalysts. *Top Catal.* **53**, 1132-1137 (2010).
13. Gandhamsetty N, Jeong J, Park J, Park S, Chang S. Boron-Catalyzed Silylative Reduction of Nitriles in Accessing Primary Amines and Imines. *J. Org. Chem.* **80**, 7281-7287 (2015).
14. Tokmic K, Jackson BJ, Salazar A, Woods TJ, Fout AR. Cobalt-Catalyzed and Lewis Acid-Assisted Nitrile Hydrogenation to Primary Amines: A Combined Effort. *J. Am. Chem. Soc.* **139**, 13554-13561 (2017).

15. Dai H, Guan H. Switching the Selectivity of Cobalt-Catalyzed Hydrogenation of Nitriles. *ACS Catal.* **8**, 9125-9130 (2018).
16. Lu S, Wang J, Cao X, Li X, Gu H. Selective synthesis of secondary amines from nitriles using Pt nanowires as a catalyst. *Chem Commun.* **50**, 3512-3515 (2014).
17. He W, et al. Pt-Sn/?-Al<sub>2</sub>O<sub>3</sub>-Catalyzed Highly Efficient Direct Synthesis of Secondary and Tertiary Amines and Imines. *Chem. Eur. J.* **17**, 13308-13317 (2011).
18. Shao Z, Fu S, Wei M, Zhou S, Liu Q. Mild and Selective Cobalt-Catalyzed Chemodivergent Transfer Hydrogenation of Nitriles. *Angew Chem Int Ed Engl.* **55**, 14653-14657 (2016).
